# Supplementary material for: A practical strategy for chemical profiling of herbal medicines using ultra-high performance liquid chromatography coupled with hybrid triple quadrupole-linear ion trap mass spectrometry: a case study of Mori Cortex
Source: Royal Society of Chemistry journal article supplement (doi:10.1039/c4ay02196g), 2014-10-28
Supplement: c4ay02196g1.pdf [file c4ay02196g1.pdf]

## Supplemental figures

# **A practical strategy for chemical profiling of herbal medicines using ultra-high performance liquid chromatography coupled with hybrid triple quadrupole-linear ion trap mass spectrometry: a case study of Mori Cortex**

Wang-Hui Jing, Ru Yan\*, Yi-Tao Wang\*

State Key Laboratory of Quality Research in Chinese Medicine, Institute of Chinese Medical Sciences, University of Macau, Taipa, Macao, China

\*To whom correspondence should be addressed

Prof. Yi-Tao Wang

Tel: 853-83974691

Fax: 853-28841358

Email: ytwang@umac.mo

Dr. Ru Yan

Tel: 853-83974876

Fax: 853-28841358

Email: ruyan@umac.mo

**Fig. S1** Representative compounds for six types of Diels-Alder type adducts.

**Fig. S2** MS<sup>2</sup> spectra, the chemical structures and the fragment ions assignment of morin-*di-O*-glucoside.

**Fig. S3** MS<sup>2</sup> spectra, the chemical structures and the fragment ions assignment of morin-*di-O*-glucoside oxyresveratrol-*O*-glucoside.

**Fig. S4** MS<sup>2</sup> spectra, the chemical structures and the fragment ions assignment of moracin M (A), moracin M-*O*-glucoside (B) and moracin M-*di-O*-glucoside (C).

**Fig. S5** MS<sup>2</sup> spectra, the chemical structures and the fragment ions assignment of moracin O (A), moracin O-*O*-glucoside (B) and moracin O-*O*-xyloside (C).

**Fig. S6** MS<sup>2</sup> spectra, the chemical structures and the fragment ions assignment of moracin P (A), and moracin P-*O*-glucoside (B).

**Fig. S7** MS<sup>2</sup> spectrum of albafulan C (A) and the proposed mass fragmentation scheme under negative ionization (B).

**Fig. S8** MS<sup>2</sup> spectrum of kuwanon C (A) and the proposed mass fragmentation scheme under positive ionization (B).

**Fig. S9** MS<sup>2</sup> spectrum of sanggenol B (A) and the proposed mass fragmentation scheme under positive ionization (B).

Kuwanon L

Mulberrofuran C

Kuwanon P

Kuwanon Q

Guangsangon L

Dimoracin

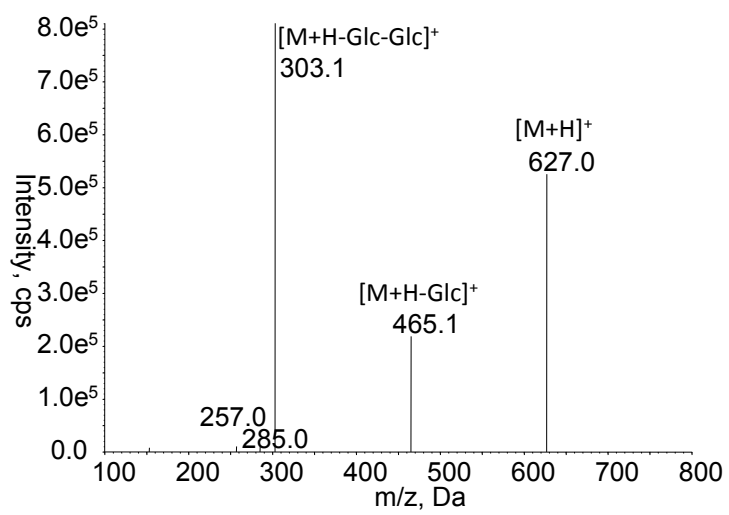

Fig. S2

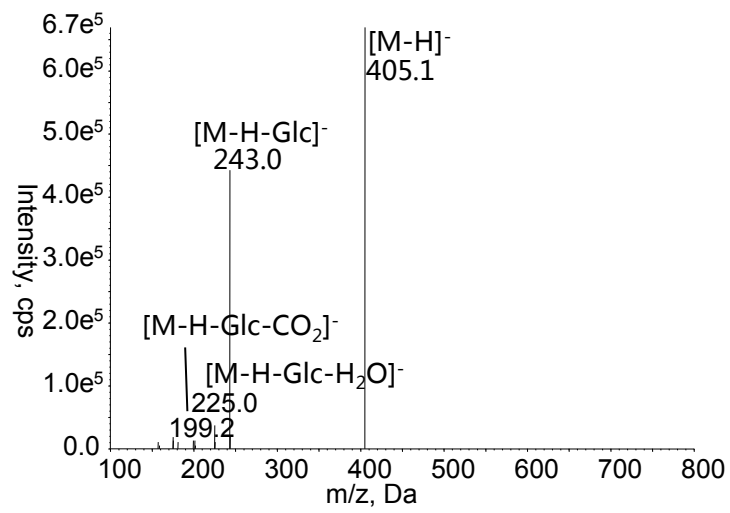

Fig. S3

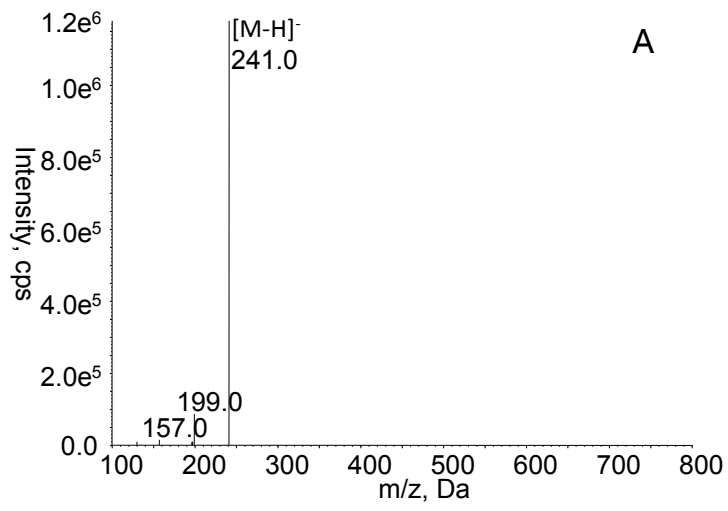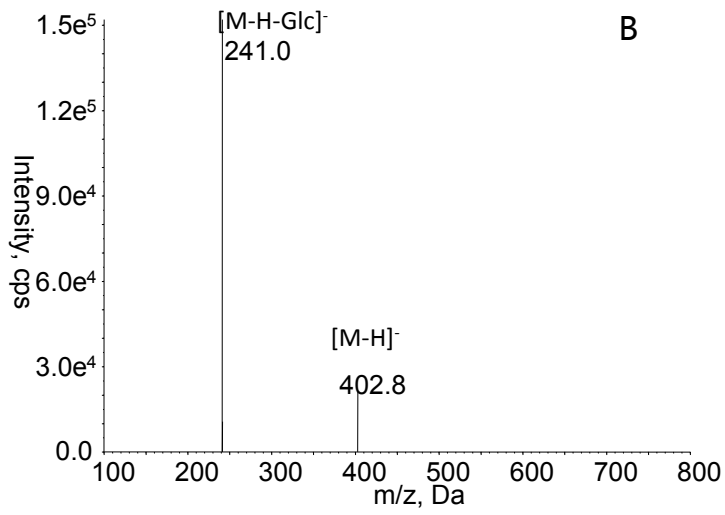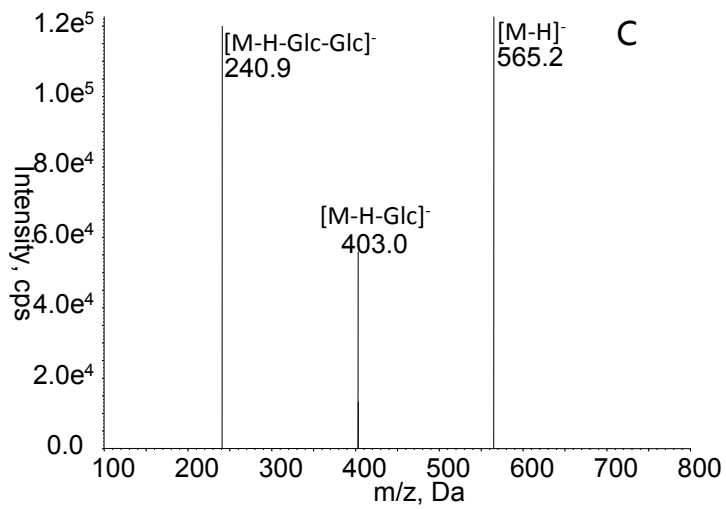

Fig. S4

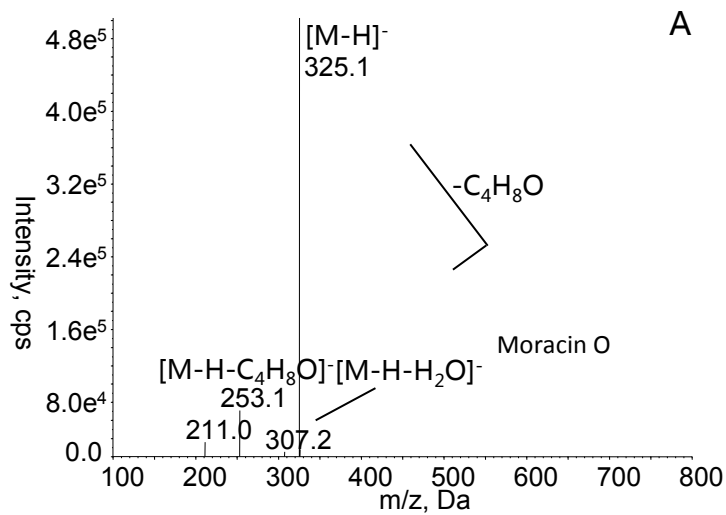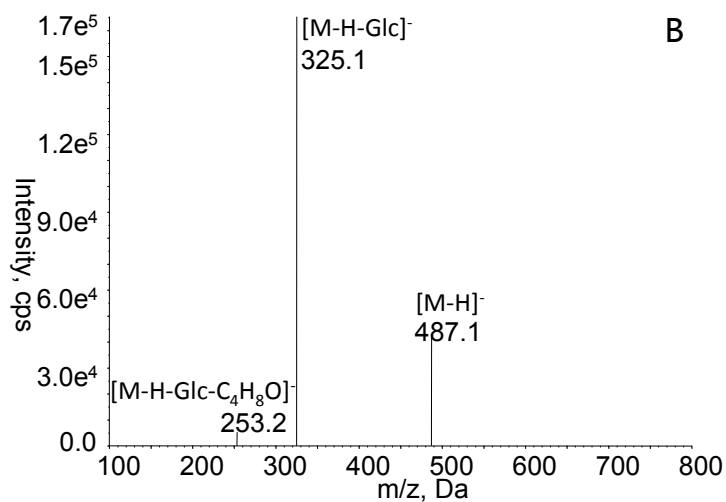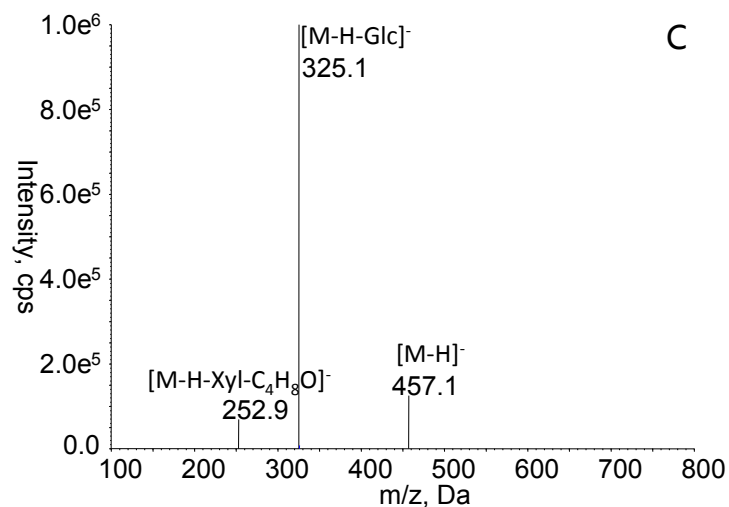

Fig. S5

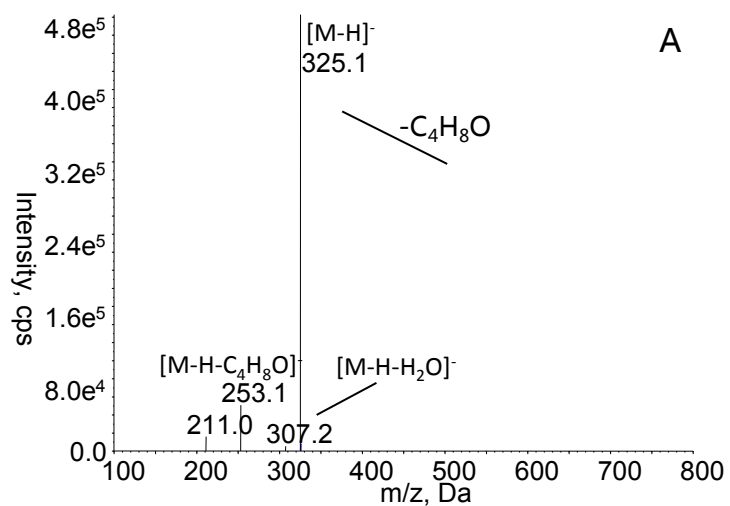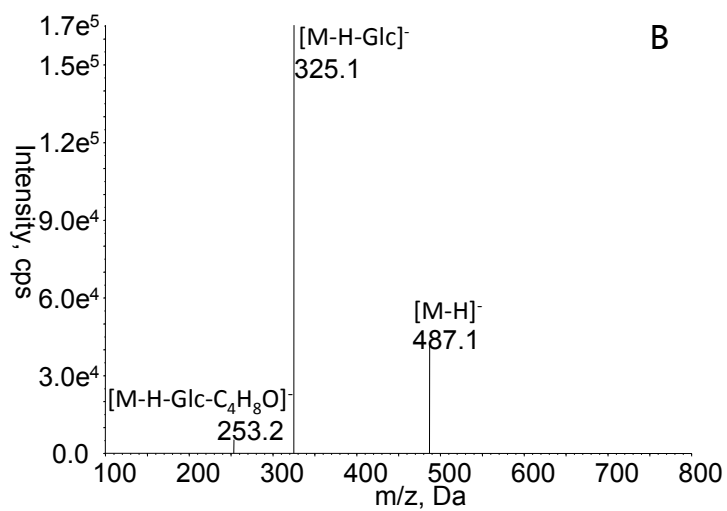

Fig. S6



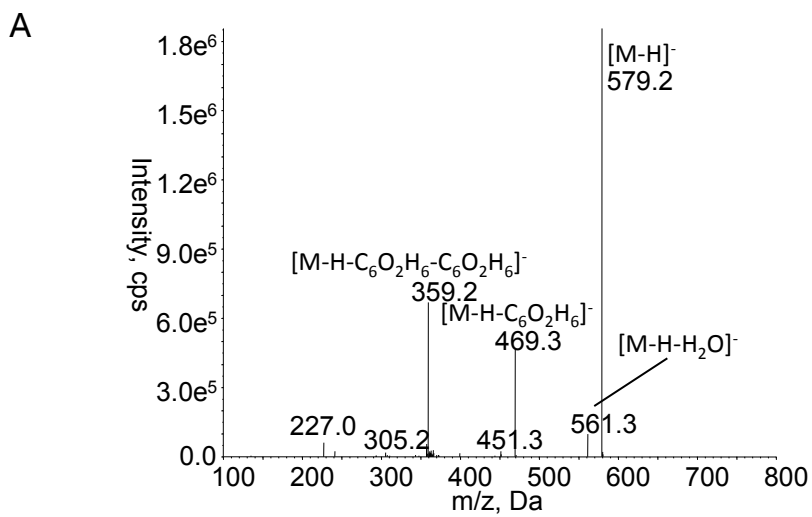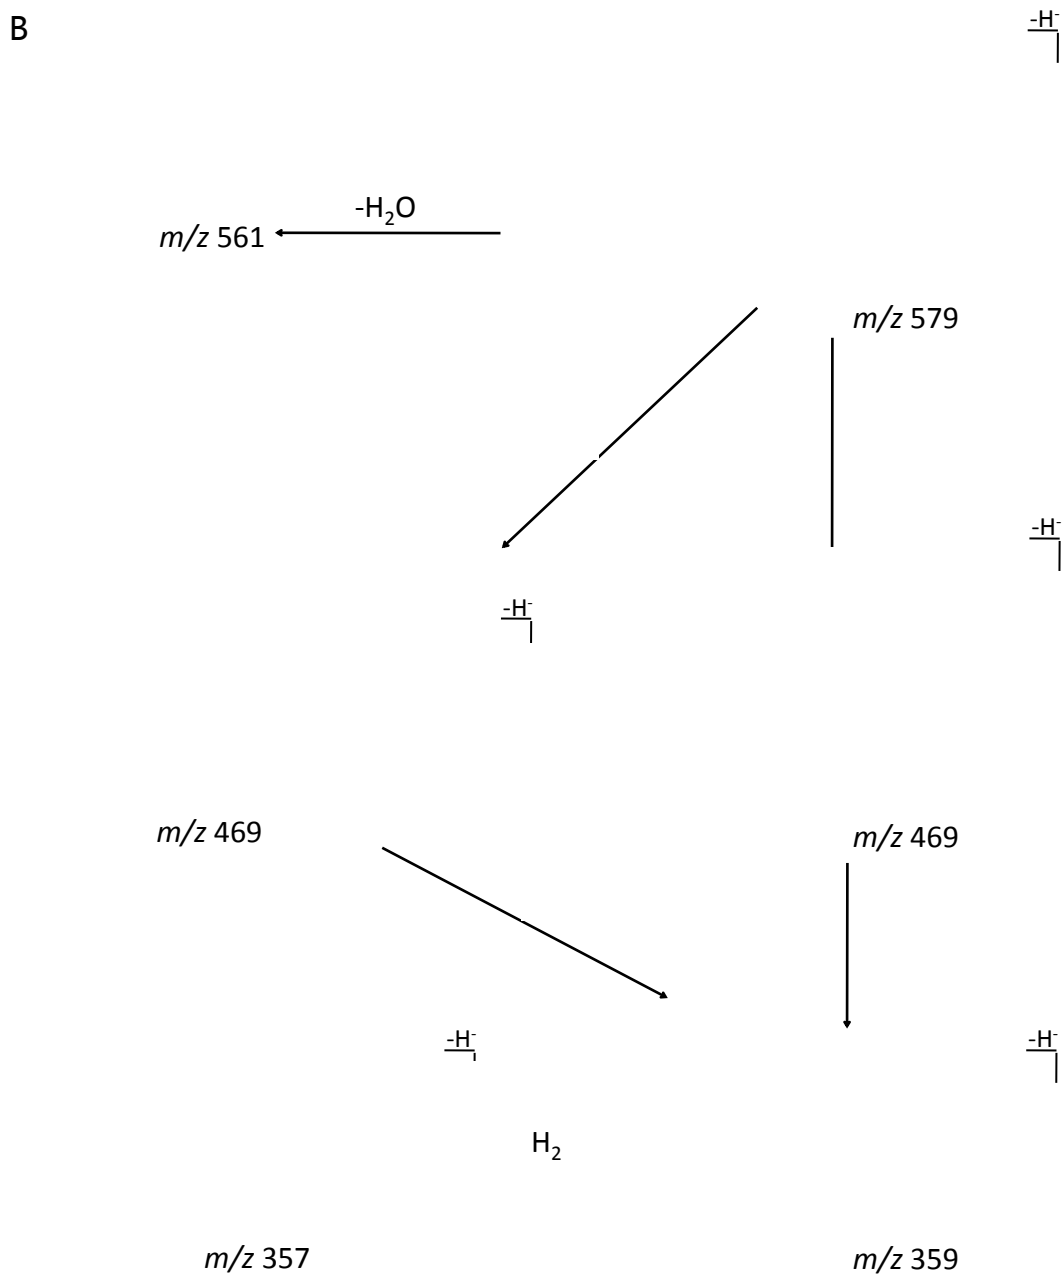

Fig. S7

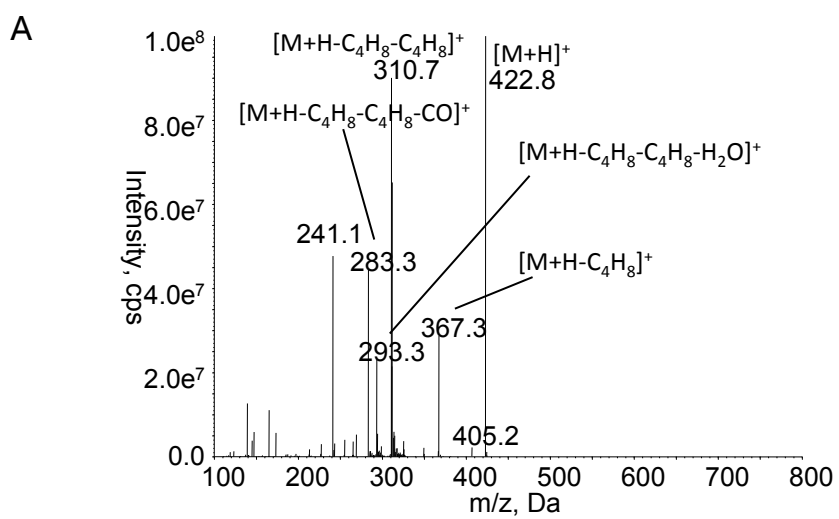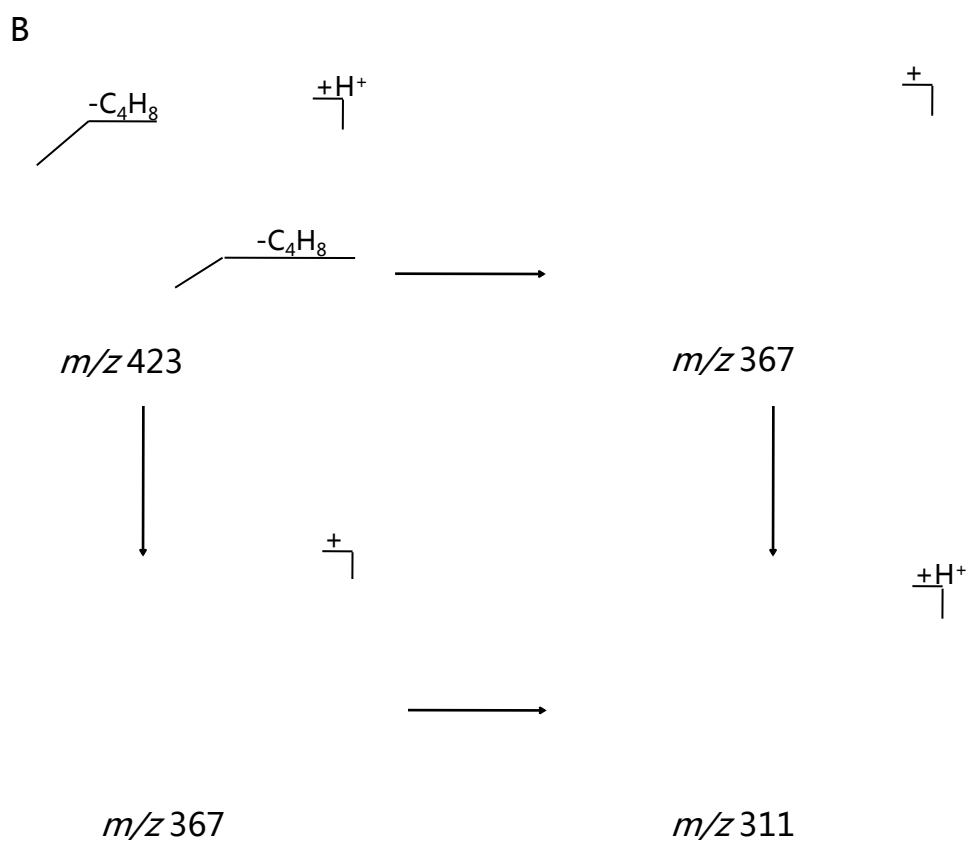

Fig. S8

A

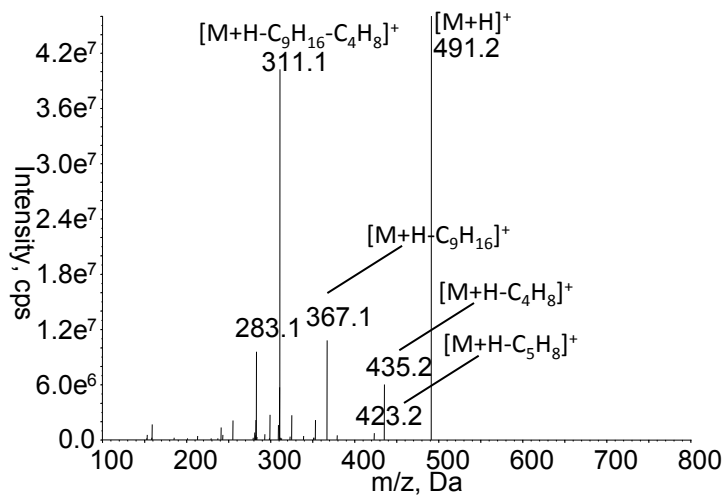

B

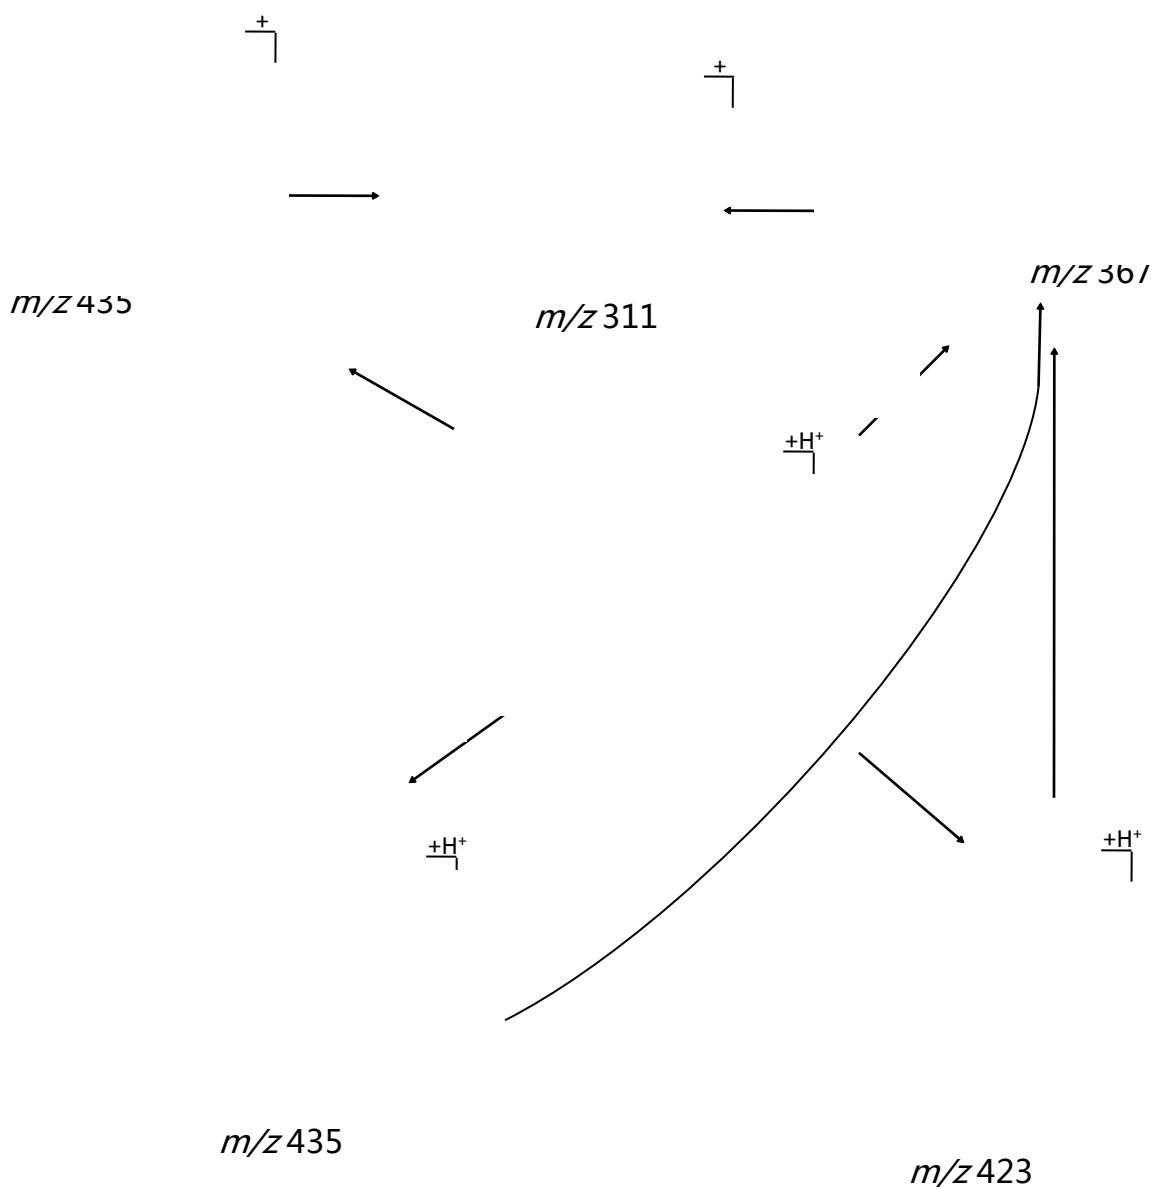

Fig. S9
