# Supplementary material for: A practical strategy for chemical profiling of herbal medicines using ultra-high performance liquid chromatography coupled with hybrid triple quadrupole-linear ion trap mass spectrometry: a case study of Mori Cortex
Source: Royal Society of Chemistry journal article supplement (doi:10.1039/c4ay02196g), 2014-10-28
Supplement: c4ay02196g2.pdf [file c4ay02196g2.pdf]

1  
2  
3  
4  
5  
6  
7  
8  
9  
10  
11  
12  
13  
14  
15  
16  
17  
18  
19  
20  
21

## Supplemental information

**A practical strategy for chemical profiling of herbal medicines using  
ultra-high performance liquid chromatography coupled with hybrid  
triple quadrupole-linear ion trap mass spectrometry: a case study of  
Mori Cortex**

Wang-Hui Jing, Ru Yan\*, Yi-Tao Wang\*

State Key Laboratory of Quality Research in Chinese Medicine, Institute of Chinese Medical  
Sciences, University of Macau, Taipa, Macao, China

\*To whom correspondence should be addressed

Prof. Yi-Tao Wang

Tel: 853-83974691

Fax: 853-28841358

Email: ytwang@umac.mo

Dr. Ru Yan

Tel: 853-83974876

Fax: 853-28841358

Email: ruyan@umac.mo

#### 22 1.1 3.4. Characterization of the chemical constituents in MC extract

23 A pair of isomers ( $t_R$ : 9.8 min for **4** and 10.6 min for **5**) afforded the sodium adduct and  
24 pseudo-molecular ions at  $m/z$  353 ( $[M+Na]^+$ ) and 331 ( $[M+H]^+$ ), indicating a molecular weight as  
25 330 Da. The prominent product ions were observed at  $m/z$  313, 289 and 153 (Table 1 and Fig. 9).  
26 However, the chemical structures of these two compounds couldn't be assigned.

27 Compound **6** exhibited sodium adduct and quasi-molecular ions at  $m/z$  501 ( $[M+Na]^+$ ), 479  
28 ( $[M+H]^+$ ) and 477 ( $[M-H]^-$ ), suggesting a molecular weight as 478 Da. On the basis of our  
29 chemical reviews (Table S1), this component was tentatively characterized as Moracin W (Table 1).

30 Both compounds **28** ( $t_R$ : 22.2 min) and **92** ( $t_R$ : 43.3 min) showed sodium adduct and quasi-  
31 molecular ions at  $m/z$  651 ( $[M+Na]^+$ ), 629 ( $[M+H]^+$ ) and 627 ( $[M-H]^-$ ), and the positive product  
32 ions of compound **28** were observed at  $m/z$  601 ( $[M+H-CO]^+$ ), 570, 423, 395 and 367, while the  
33 deprotonated ion of compound **92** yielded diagnostic product ions at  $m/z$  609, 517 and 407 (Table  
34 1 and Fig. 9). Based on the mass spectral value, compounds **28** and **92** were tentatively identified  
35 as mulberrofuran K and yunanensin E. Similarly, the mass spectral values compounds **18** ( $t_R$ : 16.2  
36 min), **19** ( $t_R$ : 16.4 min) and **23** ( $t_R$ : 21.9 min) included  $m/z$  617 ( $[M+Na]^+$ ), 595 ( $[M+H]^+$ ), 567  
37 ( $[M+H-CO]^+$ ), 536, *et al.* (Table 1 and Fig. 9). Therefore, compounds **18**, **19** and **23** were  
38 provisionally characterized as the analogs of compound **28** with a molecular weight as 594 Da,  
39 thus these four compounds were characterized as kuwanon Z and its isomers.

40 The sodium adduct and protonated ions of compounds **30** ( $t_R$ : 23.7 min), **31** ( $t_R$ : 24.9 min) and  
41 **32** ( $t_R$ : 25.6 min) were exhibited at  $m/z$  459 ( $[M+Na]^+$ ) and 437 ( $[M+H]^+$ ). The positive product  
42 ions were shown at  $m/z$  419, 365, and 359, indicating the neutral losses of a  $H_2O$  group, a  $C_4H_8O$   
43 (72 Da) group and a  $C_4H_8O$  group couple with a  $C_4H_8$  group (56 Da) (Table 1 and Fig. 9). On the  
44 basis of our chemical reviews (Table S1), these three components were tentatively characterized  
45 as benzokuwanon E, sanggenon A and their isomer.

46 As one of major constituents in MC, kuwanon G (**73**) was detected at 38.1 min, and its mass  
47 spectral values were exhibited at  $m/z$  715 ( $[M+Na]^+$ ), 693 ( $[M+H]^+$ ), 691 ( $[M-H]^-$ ), 581 and 471,  
48 corresponding to the sodium adduct ion, protonated ion, deprotonated ion, the neutral loss of a  
49  $C_2H_6O_2$  (110 Da) group and the neutral loss of two  $C_2H_6O_2$  groups ( $2 \times 110$  Da) (Fig. 5). Similar  
50 to this mass fragment pattern, the isomers of kuwanon G were observed at retention times of 26.1  
51 min (**33**), 37.9 min (**72**), 39.4 min (**79**) and 40.5 min (**85**), sequentially (Table 1 and Fig. 9).

52 Compounds **37** and **39** were eluted at the retention times of 27.6 min and 28.4 min  
53 successively. The dominant product ions of the deprotonated ion ( $m/z$  409  $[M-H]^-$ ) were yielded  
54 at  $m/z$  391, 327, 309 and 209 (Table 1 and Fig. 9). Based on our summary on the chemical  
55 components of MC (Table S1), these two compounds were tentatively identified as wittifuran A  
56 and wittifuran U.

57 Morusin (**107**) was detected as the most abundant constituent in MC at the retention time of  
58 48.0 min with the mass spectral values at  $m/z$  443 ( $[M+Na]^+$ ), 421 ( $[M+H]^+$ ), 419 ( $[M-H]^-$ ), 365  
59 ( $[M+H-C_4H_8]^+$ ), 337 ( $[M+H-C_4H_8-H_2O]^+$ ) and 299. Meanwhile, its isomers were observed at  
60 28.1 min (**38**), 33.7 min (**57**), 44.5 min (**97**), 46.1 min (**102**), 49.1 min (**110**), 49.5 min (**112**), 50.3  
61 min (**115**) and 51.6 min (**121**) (Table 1 and Fig. 9).

62 Compound **40** was observed at 29.5 min, and the sodium adduct and quasi-molecular ions at  
63  $m/z$  353 ( $[M+Na]^+$ ), 331 ( $[M+H]^+$ ) and 329 ( $[M-H]^-$ ), suggesting a molecular weight as 330 Da  
64 (Table 1 and Fig. 9). However, the chemical structure of this compound cannot be elucidated due  
65 to the insufficient structural information.

66 The sodium adduct and quasi-molecular ions of  $m/z$  735 ( $[M+Na]^+$ ), 713 ( $[M+H]^+$ ) and 711  
67 ( $[M-H]^-$ ) were detected at retention times of 30.0 min (**41**), 30.2 min (**44**), 31.5 min (**48**), 32.6 min  
68 (**51**), 32.8 min (**53**) and 35.2 min (**63**) (Table 1 and Fig. 9). Meanwhile, the diagnostic product  
69 ions of the deprotonated ion were shown at  $m/z$  601 and 491, suggesting the successively neutral  
70 losses of two resorcinol groups ( $2 \times 110$  Da). Above all, these compounds were tentatively  
71 identified as sanggenon T and its isomers.

72 Sodium adduct and pseudo-molecular ions of  $m/z$  783 ( $[M+Na]^+$ ), 761 ( $[M+H]^+$ ) and 759 ( $[M-$   
73  $H]^-$ ) were observed at 30.6 min (**45**), 36.7 min (**68**), 38.9 min (**77**), 42.6 min (**88**), 43.0 min (**90**).  
74 The characteristic product ions of the protonated ion included  $m/z$  705 ( $[M+H-C_4H_8]^+$ ), 687  
75 ( $[M+H-C_4H_8-H_2O]^+$ ), 649 ( $[M+H-C_4H_8-C_4H_8]^+$ ), 421, 365 and 355 (Table 1 and Fig. 9).  
76 Collectively, these five compounds were tentatively identified as kuwanon N, kuwanon H and  
77 their isomers.

78 Compound **46** was eluted at 31.1 min, and exhibited sodium adduct and quasi-molecular ions  
79 at  $m/z$  615 ( $[M+Na]^+$ ), 593 ( $[M+H]^+$ ) and 591 ( $[M-H]^-$ ). The negative  $MS^2$  spectrum of the  
80 deprotonated ion gave diagnostic product ions at  $m/z$  481 and 463, indicating the neutral loss of a  
81 resorcinol group and a  $H_2O$  group (Table 1 and Fig. 9), successively. Collectively, this component

82 was tentatively characterized as mulberrofuran Q.

83 Compounds **47** ( $t_R$ : 31.4 min) and **49** ( $t_R$ : 32.3 min) showed sodium adduct ion, protonated ion  
84 and deprotonated ion at  $m/z$  733 ( $[M+Na]^+$ ), 711 ( $[M+H]^+$ ) and 709 ( $[M-H]^-$ ), respectively. In the  
85 negative MS<sup>2</sup> spectrum of the precursor ion at  $m/z$  709 ( $[M-H]^-$ ), the fragment ions were shown at  
86  $m/z$  599  $[M-H-C_6H_6O_2]^-$ , 489  $[M-H-C_6H_6O_2-C_6H_6O_2]^-$ , 437, 371 and 309 (Table 1 and Fig. 9).  
87 As a consequence, these two compounds were tentatively identified as moracenin D and its isomer.

88 Compound **50** was observed at 32.5 min, and exhibiting mass spectral values as  $m/z$  587  
89 ( $[M+Na]^+$ ), 565 ( $[M+H]^+$ ), 563 ( $[M-H]^-$ ), 563 ( $[M-H-H_2O]^-$ ) and 453 ( $[M-H-C_6H_6O_2]^-$ ) (Table 1  
90 and Fig. 9). Based on our phytochemical review (Table S1), this component was tentatively  
91 characterized as kuwanol A.

92 Sodium adduct ion and quasi-molecular ions of  $m/z$  377 ( $[M+Na]^+$ ), 355 ( $[M+H]^+$ ) and 353  
93 ( $[M-H]^-$ ) were observed at 33.4 min (**55**), 34.8 min (**60**), 35.4 min (**65**) and 37.2 min (**69**), while  
94 the positive diagnostic fragment ions were given at  $m/z$  337, 299 and 281, corresponding to the  
95 neutral losses of a H<sub>2</sub>O group, a butene (C<sub>4</sub>H<sub>8</sub>, 56 Da) moiety, and a butene group plus H<sub>2</sub>O  
96 molecule, respectively (Table 1 and Fig. 9). Consequently, these four compounds were  
97 characterized as glyasperin F, licoisofavanone, morachalcone C and their isomer.

98 The sodium adduct ion and quasi-molecular ions of  $m/z$  631 ( $[M+Na]^+$ ), 609 ( $[M+H]^+$ ) and  
99 607 ( $[M-H]^-$ ), which were presupposed for guangsangon G and guangsangon I, were detected at  
100 33.6 min (**56**) and 35.3 min (**64**). The MS<sup>2</sup> spectrum of the deprotonated ion showed diagnostic  
101 product ions at  $m/z$  597 and 487, suggesting the successively neutral losses of two C<sub>6</sub>H<sub>6</sub>O<sub>2</sub> (110  
102 Da) groups (Table 1 and Fig. 9). Thus, these two compounds were tentatively characterized as  
103 guangsangon G and guangsangon I.

104 Compound **59** was eluted at 33.9 min, and its sodium adduct ion and quasi-molecular ions  
105 were exhibited at  $m/z$  649 ( $[M+Na]^+$ ), 627 ( $[M+H]^+$ ) and 625 ( $[M-H]^-$ ), suggesting a molecular  
106 weight as 626 Da. The diagnostic product ions at  $m/z$  499 and 389 corresponded to the  
107 sequentially neutral losses of a C<sub>6</sub>H<sub>6</sub>O<sub>3</sub> (126 Da) group and a C<sub>6</sub>H<sub>6</sub>O<sub>2</sub> (110 Da) group (Table 1 and  
108 Fig. 9). Therefore, this compound was tentatively identified as kuwanon L or guangsangon K.

109 The sodium adduct ion and pseudo-molecular ions of  $m/z$  585 ( $[M+Na]^+$ ), 563 ( $[M+H]^+$ ) and  
110 561 ( $[M-H]^-$ ) were detected at 34.9 min (**61**) and 35.5 min (**66**). The diagnostic product ion at  $m/z$   
111 451 under negative ionization suggested the neutral loss of a resorcinol (C<sub>6</sub>H<sub>6</sub>O<sub>2</sub>, 110 Da) group

112 (Table 1 and Fig. 9). Hence, these two compounds were tentatively identified as mulberrofuran G,  
113 isomulberrofuran G, or kuwanol A.

114 The sodium adduct ion and quasi-molecular ions of  $m/z$  717 ( $[M+Na]^+$ ), 695 ( $[M+H]^+$ ) and  
115 693 ( $[M-H]^-$ ) were presupposed for kuwanon O, and were observed at 35.2 min (**62**), 38.5 min  
116 (**75**), 39.1 min (**78**), 39.9 min (**83**), 41.4 min (**86**), 42.4 min (**87**) and 42.8 min (**89**). The diagnostic  
117 fragment ions for the protonated ion were detected at  $m/z$  677 ( $[M+Na-H_2O]^+$ ), 639 ( $[M+Na-$   
118  $C_4H_8]^+$ ), 567 ( $[M+Na-C_4H_8O]^+$ ), 519, 499, 341 and 323 (Table 1 and Fig. 9). Collectively, these  
119 components were tentatively identified as kuwanon O and its isomers.

120 The mass spectral values of compound **70** (37.5 min) included  $m/z$  375 ( $[M+Na]^+$ ), 353  
121 ( $[M+H]^+$ ), 323 and 295 (Table 1 and Fig. 9). Based on our summary on the chemical components  
122 of MC (Table S1), this compound was tentatively identified as cyclocommunol.

123 Oxidation is a common biosynthetic pathway in herb. The sodium adduct ion and pseudo-  
124 molecular ions of  $m/z$  461 ( $[M+Na]^+$ ), 439 ( $[M+H]^+$ ) and 437 ( $[M-H]^-$ ) were presupposed for the  
125 oxidation products of dihydromorusin and its isomers, and they were detected at 38.4 min (**74**),  
126 39.6 min (**82**), 50.8 min (**117**), 51.0 min (**119**) and 51.2 min (**120**) (Table 1 and Fig. 9). However,  
127 the fragment patterns of these five components were categorized into two groups: compounds **74**  
128 and **82** yielded positive diagnostic product ions at  $m/z$  421 ( $[M+H-H_2O]^+$ ), 365 ( $[M+H-C_4H_8]^+$ ),  
129 347 ( $[M+H-H_2O-C_4H_8]^+$ ) and 311, while compounds **117**, **119** and **120** afforded negative  
130 characteristic product ions at  $m/z$  311 ( $[M-H-C_6H_6O_3]^-$ ), 285 and 259, suggesting that the  
131 oxidation occurred on different positions for these two groups. Due to the observation of  
132 successively neutral losses of a  $H_2O$  group and a  $C_4H_8$  group, the hydroxyl moiety was added onto  
133 the  $C_5$  (isopentenyl) substituent of compounds **74** and **82**. At the meanwhile, the hydroxyl  
134 substituent was added onto the B-ring of the flavones skeleton for compounds **117**, **119** and **120**.

135 The sodium adduct ion and pseudo-molecular ions of  $m/z$  447 ( $[M+Na]^+$ ), 425 ( $[M+H]^+$ ) and  
136 423 ( $[M-H]^-$ ) were detected at 38.9 min (**76**) (Table 1 and Fig. 9). Thus, the chemical structure of  
137 compound **76** was tentatively assigned as kuwanon E, cathayanon H, or lespedezaflavanone C.  
138 cannot be elucidated. At the meanwhile, compound **81** ( $t_R$ : 39.5 min) also could not be identified  
139 based on the mass spectral values, including:  $m/z$  427 ( $[M-H]^-$ ), 297, 257, 243 and 191 (Table 1  
140 and Fig. 9).

141 Compound **91** exhibited sodium adduct and protonated ion at  $m/z$  653 ( $[M+Na]^+$ ), and 631

142 ([M+H]<sup>+</sup>), respectively, suggesting a molecular weight as 630 Da, while the fragment ions of the  
143 protonated ion were yielded at *m/z* 575 ([M+H-C<sub>4</sub>H<sub>8</sub>]<sup>+</sup>), 521 ([M+H-C<sub>6</sub>H<sub>6</sub>O]<sup>+</sup>), 509, 453 and 323  
144 (Table 1 and Fig. 9). Based on our chemical review, this compound was tentatively characterized  
145 as mulberrofuran F or mongolicin A.

146 Compound **108** was eluted at 48.4 min and came out with the sodium adduct ion and quasi-  
147 molecular ions at *m/z* 429 ([M+Na]<sup>+</sup>), 407 ([M+H]<sup>+</sup>) and 405 ([M-H]<sup>-</sup>), while the positive  
148 fragment ions were afforded at *m/z* 351 ([M+H-C<sub>4</sub>H<sub>8</sub>]<sup>+</sup>), 339, 295 ([M+H-C<sub>4</sub>H<sub>8</sub>-C<sub>4</sub>H<sub>8</sub>]<sup>+</sup>) and 283  
149 (Table 1 and Fig. 9). Collectively, this compound was tentatively identified as kuwanon S or its  
150 isomer. At the meanwhile, the pseudo-molecular ions of *m/z* 427 ([M+Na]<sup>+</sup>) and 405 ([M+H]<sup>+</sup>)  
151 that were presupposed as the dehydrogenation product of kuwanon S, were detected at 51.0 min  
152 (**118**), 53.8 min (**127**) and 55.7 min (**131**). The positive diagnostic fragment ions were observed  
153 *m/z* 351 ([M+H-C<sub>4</sub>H<sub>8</sub>]<sup>+</sup>), 321 and 283 (Table 1 and Fig. 9). Hence, compounds **118**, **127** and **131**  
154 were tentatively identified as dehydrogenation product of kuwanon S or its isomers, yet their  
155 structures could not be definitely identified.

156 Deprotonated ion at *m/z* 455 was detected at 56.4 min (**133**) and 57.1 min (**134**) (Table 1 and  
157 Fig. 9). Based on our summary on the chemical components of MC (Table S1), these two  
158 compounds were tentatively identified as mulberrofuran R and its isomer.

159

160 **Table S1** The precursor ions (deprotonated, protonated and sodiated molecular ions)  
 161 of potential chemical components in Mori Cortex adopted in the MIM-IDA-EPI

| No. | [M-H] <sup>-</sup> | [M+H] <sup>+</sup> | [M+Na] <sup>+</sup> | No. | [M-H] <sup>-</sup> | [M+H] <sup>+</sup> | [M+Na] <sup>+</sup> | No. | [M-H] <sup>-</sup> | [M+H] <sup>+</sup> | [M+Na] <sup>+</sup> |
|-----|--------------------|--------------------|---------------------|-----|--------------------|--------------------|---------------------|-----|--------------------|--------------------|---------------------|
| 1   | 132                | 134                | 156                 | 53  | 409                | 411                | 433                 | 105 | 575                | 577                | 599                 |
| 2   | 141                | 143                | 165                 | 54  | 411                | 413                | 435                 | 106 | 577                | 579                | 601                 |
| 3   | 143                | 145                | 167                 | 55  | 413                | 415                | 437                 | 107 | 579                | 581                | 603                 |
| 4   | 146                | 148                | 170                 | 56  | 417                | 419                | 441                 | 108 | 581                | 583                | 605                 |
| 5   | 157                | 159                | 181                 | 57  | 419                | 421                | 443                 | 109 | 585                | 587                | 609                 |
| 6   | 159                | 161                | 183                 | 58  | 421                | 423                | 445                 | 110 | 589                | 591                | 613                 |
| 7   | 162                | 164                | 186                 | 59  | 423                | 425                | 447                 | 111 | 591                | 593                | 615                 |
| 8   | 174                | 176                | 198                 | 60  | 425                | 427                | 449                 | 112 | 593                | 595                | 617                 |
| 9   | 176                | 178                | 200                 | 61  | 427                | 429                | 451                 | 113 | 605                | 607                | 629                 |
| 10  | 177                | 179                | 201                 | 62  | 435                | 437                | 459                 | 114 | 607                | 609                | 631                 |
| 11  | 190                | 192                | 214                 | 63  | 437                | 439                | 461                 | 115 | 609                | 611                | 633                 |
| 12  | 191                | 193                | 215                 | 64  | 439                | 441                | 463                 | 116 | 615                | 617                | 639                 |
| 13  | 204                | 206                | 228                 | 65  | 441                | 443                | 465                 | 117 | 623                | 625                | 647                 |
| 14  | 225                | 227                | 249                 | 66  | 445                | 447                | 469                 | 118 | 625                | 627                | 649                 |
| 15  | 227                | 229                | 251                 | 67  | 447                | 449                | 471                 | 119 | 627                | 629                | 651                 |
| 16  | 241                | 243                | 265                 | 68  | 449                | 451                | 473                 | 120 | 629                | 631                | 653                 |
| 17  | 243                | 245                | 267                 | 69  | 453                | 455                | 477                 | 121 | 631                | 633                | 655                 |
| 18  | 245                | 247                | 269                 | 70  | 455                | 457                | 479                 | 122 | 637                | 639                | 661                 |
| 19  | 257                | 259                | 281                 | 71  | 457                | 459                | 481                 | 123 | 641                | 643                | 665                 |
| 20  | 265                | 267                | 289                 | 72  | 459                | 461                | 483                 | 124 | 645                | 647                | 669                 |
| 21  | 269                | 271                | 293                 | 73  | 461                | 463                | 485                 | 125 | 647                | 649                | 671                 |
| 22  | 271                | 273                | 295                 | 74  | 465                | 467                | 489                 | 126 | 649                | 651                | 673                 |
| 23  | 285                | 287                | 309                 | 75  | 467                | 469                | 491                 | 127 | 661                | 663                | 685                 |
| 24  | 287                | 289                | 311                 | 76  | 469                | 471                | 493                 | 128 | 665                | 667                | 689                 |
| 25  | 289                | 291                | 313                 | 77  | 475                | 477                | 499                 | 129 | 675                | 677                | 699                 |
| 26  | 293                | 295                | 317                 | 78  | 477                | 479                | 501                 | 130 | 677                | 679                | 701                 |

---

|    |     |     |     |     |     |     |     |     |     |     |     |
|----|-----|-----|-----|-----|-----|-----|-----|-----|-----|-----|-----|
| 27 | 301 | 303 | 325 | 79  | 479 | 481 | 503 | 131 | 679 | 681 | 703 |
| 28 | 307 | 309 | 331 | 80  | 481 | 483 | 505 | 132 | 689 | 691 | 713 |
| 29 | 309 | 311 | 333 | 81  | 483 | 485 | 507 | 133 | 691 | 693 | 715 |
| 30 | 311 | 313 | 335 | 82  | 485 | 487 | 509 | 134 | 693 | 695 | 717 |
| 31 | 323 | 325 | 347 | 83  | 487 | 489 | 511 | 135 | 703 | 705 | 727 |
| 32 | 325 | 327 | 349 | 84  | 489 | 491 | 513 | 136 | 705 | 707 | 729 |
| 33 | 327 | 329 | 351 | 85  | 491 | 493 | 515 | 137 | 707 | 709 | 731 |
| 34 | 329 | 331 | 353 | 86  | 493 | 495 | 517 | 138 | 709 | 711 | 733 |
| 35 | 335 | 337 | 359 | 87  | 495 | 497 | 519 | 139 | 711 | 713 | 735 |
| 36 | 337 | 339 | 361 | 88  | 499 | 501 | 523 | 140 | 713 | 715 | 737 |
| 37 | 339 | 341 | 363 | 89  | 503 | 505 | 527 | 141 | 715 | 717 | 739 |
| 38 | 341 | 343 | 365 | 90  | 505 | 507 | 529 | 142 | 717 | 719 | 741 |
| 39 | 351 | 353 | 375 | 91  | 507 | 509 | 531 | 143 | 733 | 735 | 757 |
| 40 | 353 | 355 | 377 | 92  | 511 | 513 | 535 | 144 | 743 | 745 | 767 |
| 41 | 355 | 357 | 379 | 93  | 513 | 515 | 537 | 145 | 753 | 755 | 777 |
| 42 | 363 | 365 | 387 | 94  | 521 | 523 | 545 | 146 | 757 | 759 | 781 |
| 43 | 373 | 375 | 397 | 95  | 529 | 531 | 553 | 147 | 759 | 761 | 783 |
| 44 | 375 | 377 | 399 | 96  | 551 | 553 | 575 | 148 | 761 | 763 | 785 |
| 45 | 377 | 379 | 401 | 97  | 557 | 559 | 581 | 149 | 775 | 777 | 799 |
| 46 | 387 | 389 | 411 | 98  | 559 | 561 | 583 | 150 | 781 | 783 | 805 |
| 47 | 391 | 393 | 415 | 99  | 561 | 563 | 585 | 151 | 783 | 785 | 807 |
| 48 | 395 | 397 | 419 | 100 | 563 | 565 | 587 | 152 | 835 | 837 | 859 |
| 49 | 401 | 403 | 425 | 101 | 565 | 567 | 589 | 153 | 839 | 841 | 863 |
| 50 | 403 | 405 | 427 | 102 | 567 | 569 | 591 | 154 | 861 | 863 | 885 |
| 51 | 405 | 407 | 429 | 103 | 569 | 571 | 593 | 155 | 877 | 879 | 901 |
| 52 | 407 | 409 | 431 | 104 | 573 | 575 | 597 |     |     |     |     |

---

162

163



164 **Table S2** Chemical components from the genus *Morus* and their formula, molecular  
 165 weight (M.W.), source and reference information

| No.                    | Compound      | Formula                                         | M.W. | Source                | Ref. |
|------------------------|---------------|-------------------------------------------------|------|-----------------------|------|
| <b>DA type adducts</b> |               |                                                 |      |                       |      |
| 1                      | Kuwanon N     | C <sub>45</sub> H <sub>44</sub> O <sub>11</sub> | 760  | <i>M. lhou</i>        | 1    |
| 2                      | Kuwanon O     | C <sub>40</sub> H <sub>38</sub> O <sub>11</sub> | 694  | <i>M. lhou</i>        | 1    |
| 3                      | Kuwanon K     | C <sub>40</sub> H <sub>36</sub> O <sub>11</sub> | 692  | <i>M. alba</i>        | 2    |
| 4                      | Guangsangon G | C <sub>35</sub> H <sub>28</sub> O <sub>10</sub> | 608  | <i>M. macroura</i>    | 3    |
| 5                      | Guangsangon I | C <sub>35</sub> H <sub>28</sub> O <sub>10</sub> | 608  | <i>M. macroura</i>    | 3    |
| 6                      | Kuwnon W      | C <sub>45</sub> H <sub>42</sub> O <sub>11</sub> | 758  | <i>M. lhou</i>        | 4    |
| 7                      | Kuwanon G     | C <sub>40</sub> H <sub>36</sub> O <sub>11</sub> | 692  | <i>M. alba</i>        | 5    |
| 8                      | Kuwanon H     | C <sub>45</sub> H <sub>44</sub> O <sub>11</sub> | 760  | <i>M. alba</i>        | 5    |
| 9                      | Mongolicin D  | C <sub>45</sub> H <sub>44</sub> O <sub>10</sub> | 744  | <i>M. mongolica</i>   | 6    |
| 10                     | Moracenin C   | C <sub>45</sub> H <sub>44</sub> O <sub>11</sub> | 760  | <i>M. sp.</i>         | 7    |
| 11                     | Multicaulisin | C <sub>40</sub> H <sub>36</sub> O <sub>11</sub> | 692  | <i>M. multicaulis</i> | 8    |
| 12                     | Moracenin D   | C <sub>40</sub> H <sub>38</sub> O <sub>12</sub> | 710  | <i>M. sp.</i>         | 9    |
| 13                     | Autralisine A | C <sub>35</sub> H <sub>26</sub> O <sub>10</sub> | 606  | <i>M. australis</i>   | 10   |
| 14                     | Sanggenon C   | C <sub>40</sub> H <sub>36</sub> O <sub>12</sub> | 708  | <i>M. cathayana</i>   | 11   |
| 15                     | Sanggenon D   | C <sub>40</sub> H <sub>36</sub> O <sub>12</sub> | 708  | <i>M. cathayana</i>   | 11   |
| 16                     | Sanggenon E   | C <sub>45</sub> H <sub>44</sub> O <sub>12</sub> | 776  | <i>M. sp.</i>         | 12   |
| 17                     | Sanggenon P   | C <sub>45</sub> H <sub>44</sub> O <sub>12</sub> | 776  | <i>M. sp.</i>         | 12   |
| 18                     | Sanggenon O   | C <sub>40</sub> H <sub>36</sub> O <sub>12</sub> | 708  | <i>M. sp.</i>         | 13   |
| 19                     | Sangenol J    | C <sub>45</sub> H <sub>44</sub> O <sub>12</sub> | 776  | <i>M. cathayana</i>   | 11   |
| 20                     | Cathayanon A  | C <sub>40</sub> H <sub>36</sub> O <sub>12</sub> | 708  | <i>M. cathayana</i>   | 14   |
| 21                     | Cathayanon B  | C <sub>40</sub> H <sub>36</sub> O <sub>12</sub> | 708  | <i>M. cathayana</i>   | 14   |
| 22                     | Sanggenon Q   | C <sub>40</sub> H <sub>36</sub> O <sub>12</sub> | 708  | <i>M. mongolica</i>   | 15   |
| 23                     | Sanggenon T   | C <sub>40</sub> H <sub>40</sub> O <sub>12</sub> | 712  | <i>M. sp.</i>         | 16   |
| 24                     | Sanggenol M   | C <sub>45</sub> H <sub>46</sub> O <sub>11</sub> | 762  | <i>M. mongolica</i>   | 17   |
| 25                     | Kuwanon L     | C <sub>35</sub> H <sub>30</sub> O <sub>11</sub> | 626  | <i>M. alba</i>        | 18   |

|    |                 |                      |     |                     |    |
|----|-----------------|----------------------|-----|---------------------|----|
| 26 | Guangsangon F   | $C_{40}H_{36}O_{10}$ | 676 | <i>M. macroua</i>   | 3  |
| 27 | Guangsangon D   | $C_{35}H_{30}O_{10}$ | 610 | <i>M. macroua</i>   | 17 |
| 28 | Guangsangon H   | $C_{40}H_{38}O_{10}$ | 678 | <i>M. macroua</i>   | 3  |
| 29 | Guangsangon K   | $C_{35}H_{30}O_{11}$ | 626 | <i>M. macroua</i>   | 19 |
| 30 | Guangsangon M   | $C_{35}H_{30}O_{10}$ | 610 | <i>M. macroua</i>   | 19 |
| 31 | Guangsangon N   | $C_{35}H_{30}O_{10}$ | 610 | <i>M. macroua</i>   | 19 |
| 32 | Cathayanon E    | $C_{40}H_{36}O_{12}$ | 708 | <i>M. cathayana</i> | 20 |
| 33 | Kuwanon I       | $C_{40}H_{38}O_{10}$ | 678 | <i>M. alba</i>      | 21 |
| 34 | Kuwanon J       | $C_{40}H_{38}O_{10}$ | 678 | <i>M. alba</i>      | 22 |
| 35 | Kuwanon Q       | $C_{40}H_{38}O_9$    | 662 | <i>M. alba</i>      | 22 |
| 36 | Kuwanon R       | $C_{40}H_{38}O_9$    | 662 | <i>M. alba</i>      | 22 |
| 37 | Kuwanon V       | $C_{40}H_{38}O_8$    | 646 | <i>M. alba</i>      | 22 |
| 38 | Mongolicin G    | $C_{40}H_{40}O_{10}$ | 680 | <i>M. mongolica</i> | 23 |
| 39 | Guangsangon C   | $C_{35}H_{30}O_{10}$ | 610 | <i>M. macroua</i>   | 17 |
| 40 | Kuwanol E       | $C_{39}H_{38}O_9$    | 650 | <i>M. alba</i>      | 24 |
| 41 | Kuwanon X       | $C_{34}H_{30}O_9$    | 582 | <i>M. lhou</i>      | 25 |
| 42 | Kuwanon Y       | $C_{34}H_{30}O_9$    | 582 | <i>M. lhou</i>      | 26 |
| 43 | Kuwanol A       | $C_{34}H_{28}O_8$    | 564 | <i>M. bombycis</i>  | 27 |
| 44 | Kuwanol B       | $C_{36}H_{26}O_8$    | 586 | <i>M. bonbycis</i>  | 27 |
| 45 | Kuwanon Z       | $C_{34}H_{26}O_{10}$ | 594 | <i>M. lhou</i>      | 26 |
| 46 | Guangsangon B   | $C_{34}H_{30}O_8$    | 566 | <i>M. macroua</i>   | 17 |
| 47 | Kuwanon P       | $C_{34}H_{30}O_9$    | 582 | <i>M. lhou</i>      | 25 |
| 48 | Cathayanon C    | $C_{34}H_{24}O_8$    | 560 | <i>M. cathayana</i> | 20 |
| 49 | Cathayanon D    | $C_{34}H_{24}O_9$    | 576 | <i>M. cathayana</i> | 20 |
| 50 | Mulberrofuran C | $C_{34}H_{28}O_9$    | 580 | <i>M. bombycis</i>  | 28 |
| 51 | Mulberrofuran T | $C_{44}H_{44}O_9$    | 716 | <i>M. alba</i>      | 24 |
| 52 | Mulberrofuran U | $C_{39}H_{36}O_9$    | 648 | <i>M. insignis</i>  | 29 |
| 53 | Chalcomoracin   | $C_{39}H_{36}O_9$    | 648 | <i>M. alba</i>      | 30 |
| 54 | Mulberrofuran O | $C_{39}H_{34}O_9$    | 646 | <i>M. sp.</i>       | 31 |

---

|    |                    |                      |     |                       |    |
|----|--------------------|----------------------|-----|-----------------------|----|
| 55 | Mulberrofuran E    | $C_{39}H_{36}O_8$    | 632 | <i>M. alba</i>        | 32 |
| 56 | Mulberrofuran J    | $C_{34}H_{28}O_9$    | 580 | <i>M. lhou</i>        | 25 |
| 57 | Mongolicin F       | $C_{39}H_{36}O_9$    | 648 | <i>M. mongolica</i>   | 6  |
| 58 | Guangsangon A      | $C_{39}H_{38}O_{10}$ | 666 | <i>M. macroua</i>     | 17 |
| 59 | Albafuran C        | $C_{34}H_{28}O_9$    | 580 | <i>M. alba</i>        | 17 |
| 60 | Guangsangon E      | $C_{39}H_{36}O_9$    | 648 | <i>M. macroua</i>     | 17 |
| 61 | Guangsangon J      | $C_{39}H_{36}O_9$    | 648 | <i>M. macroua</i>     | 14 |
| 62 | Mulberrofuran F    | $C_{39}H_{34}O_8$    | 630 | <i>M. lhou</i>        | 33 |
| 63 | Mulberrofuran G    | $C_{36}H_{26}O_8$    | 586 | <i>M. lhou</i>        | 33 |
| 64 | Mongolicin A       | $C_{39}H_{34}O_8$    | 630 | <i>M. mongolica</i>   | 6  |
| 65 | Mulberrofuran Q    | $C_{39}H_{32}O_8$    | 628 | <i>M. alba</i>        | 34 |
| 66 | Mulberrofuran G    | $C_{34}H_{25}O_8$    | 562 | <i>M. alba</i>        | 35 |
| 67 | Isomulberrofuran G | $C_{34}H_{25}O_8$    | 562 | <i>M. alba</i>        | 35 |
| 68 | Mongolicin A       | $C_{39}H_{34}O_8$    | 630 | <i>M. mongolica</i>   | 6  |
| 69 | Mulberrofuran K    | $C_{39}H_{32}O_8$    | 628 | <i>M. sp.</i>         | 32 |
| 70 | Albanol B          | $C_{34}H_{22}O_8$    | 558 | <i>M. alba</i>        | 24 |
| 71 | Mulberrofuran P    | $C_{34}H_{22}O_9$    | 574 | <i>M. alba</i>        | 36 |
| 72 | Mulberrofuran I    | $C_{34}H_{24}O_8$    | 560 | <i>M. alba</i>        | 37 |
| 73 | Mulberrofuran S    | $C_{34}H_{24}O_9$    | 576 | <i>M. alba</i>        | 37 |
| 74 | Mongolicin C       | $C_{34}H_{26}O_9$    | 578 | <i>M. mongolica</i>   | 6  |
| 75 | Mulberrofuran Q    | $C_{34}H_{24}O_{10}$ | 592 | <i>M. alba</i>        | 34 |
| 76 | Australisine B     | $C_{39}H_{34}O_9$    | 646 | <i>M. australis</i>   | 10 |
| 77 | Australisine C     | $C_{34}H_{28}O_9$    | 580 | <i>M. australis</i>   | 10 |
| 78 | Yunanensin A       | $C_{39}H_{28}O_8$    | 624 | <i>M. yunnanensis</i> | 38 |
| 79 | Yunanensin B       | $C_{39}H_{34}O_9$    | 646 | <i>M. yunnanensis</i> | 38 |
| 80 | Yunanensin C       | $C_{39}H_{34}O_9$    | 646 | <i>M. yunnanensis</i> | 38 |
| 81 | Yunanensin D       | $C_{39}H_{30}O_9$    | 642 | <i>M. yunnanensis</i> | 38 |
| 82 | Yunanensin E       | $C_{39}H_{32}O_8$    | 628 | <i>M. yunnanensis</i> | 38 |
| 83 | Kuwanon M          | $C_{50}H_{48}O_{12}$ | 840 | <i>M. lhou</i>        | 39 |

---

|                                       |                           |                                                 |     |                       |    |
|---------------------------------------|---------------------------|-------------------------------------------------|-----|-----------------------|----|
| 84                                    | Mongolicin E              | C <sub>50</sub> H <sub>48</sub> O <sub>12</sub> | 840 | <i>M. mongolica</i>   | 6  |
| 85                                    | Dimoracin                 | C <sub>38</sub> H <sub>32</sub> O <sub>8</sub>  | 616 | <i>M. alba</i>        | 40 |
| 86                                    | Mulberrofuran H           | C <sub>27</sub> H <sub>22</sub> O <sub>6</sub>  | 442 | <i>M. lhou</i>        | 41 |
| 87                                    | Sanggenon R               | C <sub>20</sub> H <sub>16</sub> O <sub>5</sub>  | 336 | <i>M. sp.</i>         | 16 |
| 88                                    | Sanggenon B               | C <sub>33</sub> H <sub>30</sub> O <sub>9</sub>  | 570 | <i>M. sp.</i>         | 42 |
| 89                                    | Sanggenon S               | C <sub>40</sub> H <sub>34</sub> O <sub>12</sub> | 706 | <i>M. sp.</i>         | 16 |
| 90                                    | Guangsangon L             | C <sub>27</sub> H <sub>24</sub> O <sub>8</sub>  | 476 | <i>M. macroua</i>     | 19 |
| 91                                    | Mongolicin B              | C <sub>28</sub> H <sub>18</sub> O <sub>7</sub>  | 466 | <i>M. mongolica</i>   | 6  |
| 92                                    | Mulberrofuran R           | C <sub>27</sub> H <sub>20</sub> O <sub>7</sub>  | 456 | <i>M. lhou</i>        | 43 |
| 93                                    | Mulberrofuran M           | C <sub>34</sub> H <sub>22</sub> O <sub>10</sub> | 590 | <i>M. alba</i>        | 44 |
| 94                                    | Wittiorumin A             | C <sub>35</sub> H <sub>28</sub> O <sub>11</sub> | 624 | <i>M. wittiorum</i>   | 45 |
| 95                                    | Wittiorumin B             | C <sub>40</sub> H <sub>36</sub> O <sub>12</sub> | 708 | <i>M. wittiorum</i>   | 45 |
| 96                                    | Wittiorumin C             | C <sub>40</sub> H <sub>36</sub> O <sub>11</sub> | 692 | <i>M. wittiorum</i>   | 45 |
| 97                                    | Wittiorumin D             | C <sub>35</sub> H <sub>30</sub> O <sub>10</sub> | 610 | <i>M. wittiorum</i>   | 45 |
| 98                                    | Wittiorumin E             | C <sub>40</sub> H <sub>38</sub> O <sub>10</sub> | 678 | <i>M. wittiorum</i>   | 45 |
| 99                                    | Wittiorumin F             | C <sub>39</sub> H <sub>36</sub> O <sub>9</sub>  | 648 | <i>M. wittiorum</i>   | 45 |
| 100                                   | Mulberrofuran F1          | C <sub>39</sub> H <sub>34</sub> O <sub>9</sub>  | 646 | <i>M. alba</i>        | 46 |
| 101                                   | Cathayanin A              | C <sub>25</sub> H <sub>28</sub> O <sub>4</sub>  | 392 | <i>M. cathayana</i>   | 47 |
| 102                                   | Cathayanin B              | C <sub>40</sub> H <sub>34</sub> O <sub>11</sub> | 690 | <i>M. cathayana</i>   | 47 |
| 103                                   | Cathayanin C              | C <sub>40</sub> H <sub>34</sub> O <sub>11</sub> | 690 | <i>M. cathayana</i>   | 47 |
| 104                                   | Morusyunnansin A          | C <sub>38</sub> H <sub>32</sub> O <sub>8</sub>  | 616 | <i>M. yunnanensis</i> | 48 |
| 105                                   | Morusyunnansin B          | C <sub>38</sub> H <sub>32</sub> O <sub>8</sub>  | 616 | <i>M. yunnanensis</i> | 48 |
| 106                                   | Morusyunnansin C          | C <sub>42</sub> H <sub>48</sub> O <sub>8</sub>  | 680 | <i>M. yunnanensis</i> | 48 |
| 107                                   | Morusyunnansin D          | C <sub>42</sub> H <sub>48</sub> O <sub>8</sub>  | 680 | <i>M. yunnanensis</i> | 48 |
| <b>Stilbenes and 2-arylbenzofuran</b> |                           |                                                 |     |                       |    |
| 108                                   | Oxyresveratrol            | C <sub>14</sub> H <sub>12</sub> O <sub>4</sub>  | 244 | <i>M. alba</i>        | 49 |
| 109                                   | Resveratrol               | C <sub>14</sub> H <sub>12</sub> O <sub>3</sub>  | 228 | <i>M. alba</i>        | 49 |
| 110                                   | 2,3,4'-trihydrox stilbene | C <sub>14</sub> H <sub>14</sub> O <sub>3</sub>  | 230 | <i>M. alba</i>        | 49 |
| 111                                   | Mulberroside A            | C <sub>26</sub> H <sub>32</sub> O <sub>14</sub> | 568 | <i>M. alba</i>        | 49 |

|     |                                                              |                                                 |     |                     |    |
|-----|--------------------------------------------------------------|-------------------------------------------------|-----|---------------------|----|
| 112 | <i>cis</i> -mulberroside A                                   | C <sub>26</sub> H <sub>32</sub> O <sub>14</sub> | 568 | <i>M. alba</i>      | 49 |
| 113 | Andalasin A                                                  | C <sub>28</sub> H <sub>24</sub> O <sub>8</sub>  | 488 | <i>M. macroura</i>  | 50 |
| 114 | 4'-prenyloxyresveratrol                                      | C <sub>19</sub> H <sub>20</sub> O <sub>4</sub>  | 312 | <i>M. alba</i>      | 51 |
| 115 | Oxyresveratrol-2-glucoside                                   | C <sub>20</sub> H <sub>22</sub> O <sub>9</sub>  | 406 | <i>M. alba</i>      | 49 |
| 116 | Oxyresveratrol-3'-glucoside                                  | C <sub>20</sub> H <sub>22</sub> O <sub>9</sub>  | 406 | <i>M. alba</i>      | 49 |
| 117 | Resveratrol-4, 3'-diglucoside                                | C <sub>26</sub> H <sub>32</sub> O <sub>13</sub> | 552 | <i>M. alba</i>      | 49 |
| 118 | 3',5',2,4-tetrahydroxy-4-(-3-methyl-1-butenyl)-2-benzylfuran | C <sub>19</sub> H <sub>20</sub> O <sub>4</sub>  | 312 | <i>M. alba</i>      | 49 |
| 119 | 2-(3,5-dihydroxyphenyl)-5,6-dihydroxybenzofuran              | C <sub>14</sub> H <sub>10</sub> O <sub>5</sub>  | 258 | <i>M. wittiorum</i> | 52 |
| 120 | Moracin A                                                    | C <sub>16</sub> H <sub>14</sub> O <sub>5</sub>  | 286 | <i>M. alba</i>      | 53 |
| 121 | Moracin B                                                    | C <sub>16</sub> H <sub>14</sub> O <sub>5</sub>  | 294 | <i>M. alba</i>      | 53 |
| 122 | Moracin C                                                    | C <sub>19</sub> H <sub>18</sub> O <sub>4</sub>  | 310 | <i>M. alba</i>      | 54 |
| 123 | Moracin D                                                    | C <sub>19</sub> H <sub>16</sub> O <sub>4</sub>  | 308 | <i>M. alba</i>      | 54 |
| 124 | Moracin E                                                    | C <sub>19</sub> H <sub>16</sub> O <sub>4</sub>  | 308 | <i>M. alba</i>      | 55 |
| 125 | Moracin F                                                    | C <sub>16</sub> H <sub>14</sub> O <sub>5</sub>  | 294 | <i>M. alba</i>      | 55 |
| 126 | Moracin G                                                    | C <sub>19</sub> H <sub>16</sub> O <sub>4</sub>  | 308 | <i>M. alba</i>      | 55 |
| 127 | Moracin H                                                    | C <sub>20</sub> H <sub>18</sub> O <sub>5</sub>  | 338 | <i>M. alba</i>      | 55 |
| 128 | Moracin I                                                    | C <sub>20</sub> H <sub>20</sub> O <sub>4</sub>  | 324 | <i>M. alba</i>      | 56 |
| 129 | Moracin J                                                    | C <sub>20</sub> H <sub>20</sub> O <sub>4</sub>  | 324 | <i>M. alba</i>      | 18 |
| 130 | Moracin K                                                    | C <sub>19</sub> H <sub>16</sub> O <sub>5</sub>  | 324 | <i>M. mesozygia</i> | 57 |
| 131 | Moracin L                                                    | C <sub>19</sub> H <sub>16</sub> O <sub>5</sub>  | 324 | <i>M. alba</i>      | 18 |
| 132 | Moracin M                                                    | C <sub>14</sub> H <sub>10</sub> O <sub>4</sub>  | 242 | <i>M. mesozygia</i> | 57 |
| 133 | Moracin N                                                    | C <sub>19</sub> H <sub>18</sub> O <sub>4</sub>  | 310 | <i>M. alba</i>      | 58 |
| 134 | Moracin O                                                    | C <sub>19</sub> H <sub>18</sub> O <sub>5</sub>  | 326 | <i>M. alba</i>      | 58 |
| 135 | Moracin P                                                    | C <sub>19</sub> H <sub>18</sub> O <sub>5</sub>  | 326 | <i>M. alba</i>      | 58 |
| 136 | Moracin Q                                                    | C <sub>21</sub> H <sub>22</sub> O <sub>5</sub>  | 354 | <i>M. mesozygia</i> | 57 |
| 137 | Moracin R                                                    | C <sub>19</sub> H <sub>20</sub> O <sub>5</sub>  | 328 | <i>M. mesozygia</i> | 57 |
| 138 | Moracin S                                                    | C <sub>19</sub> H <sub>18</sub> O <sub>4</sub>  | 310 | <i>M. mesozygia</i> | 57 |

---

|     |                |                   |     |                     |    |
|-----|----------------|-------------------|-----|---------------------|----|
| 139 | Moracin T      | $C_{20}H_{20}O_5$ | 340 | <i>M. mesozygia</i> | 57 |
| 140 | Moracin U      | $C_{19}H_{16}O_6$ | 340 | <i>M. mesozygia</i> | 57 |
| 141 | Moracin V      | $C_{19}H_{18}O_6$ | 342 | <i>M. alba</i>      | 58 |
| 142 | Moracin W      | $C_{29}H_{34}O_6$ | 478 | <i>M. alba</i>      | 58 |
| 143 | Moracin X      | $C_{16}H_{10}O_4$ | 266 | <i>M. alba</i>      | 58 |
| 144 | Moracin Y      | $C_{15}H_{10}O_5$ | 270 | <i>M. alba</i>      | 58 |
| 145 | Moracin Z      | $C_{19}H_{18}O_5$ | 326 | <i>M. lhou</i>      | 59 |
| 146 | Albafuran A    | $C_{24}H_{26}O_4$ | 378 | <i>M. nigra</i>     | 60 |
| 147 | Albafuran B    | $C_{24}H_{26}O_4$ | 378 | <i>M. nigra</i>     | 60 |
| 148 | Macrourin A    | $C_{29}H_{32}O_5$ | 460 | <i>M. macroura</i>  | 61 |
| 149 | Macrourin B    | $C_{28}H_{20}O_9$ | 500 | <i>M. macroura</i>  | 61 |
| 150 | Mulberroside C | $C_{24}H_{26}O_9$ | 458 | <i>M. wittiorum</i> | 52 |
| 151 | Wittifuran A   | $C_{24}H_{26}O_6$ | 410 | <i>M. wittiorum</i> | 60 |
| 152 | Wittifuran B   | $C_{24}H_{24}O_5$ | 392 | <i>M. wittiorum</i> | 60 |
| 153 | Wittifuran C   | $C_{29}H_{36}O_7$ | 496 | <i>M. wittiorum</i> | 60 |
| 154 | Wittifuran D   | $C_{19}H_{18}O_4$ | 310 | <i>M. wittiorum</i> | 52 |
| 155 | Wittifuran E   | $C_{14}H_{10}O_5$ | 258 | <i>M. wittiorum</i> | 52 |
| 156 | Wittifuran F   | $C_{29}H_{34}O_6$ | 478 | <i>M. wittiorum</i> | 60 |
| 157 | Wittifuran G   | $C_{29}H_{34}O_6$ | 478 | <i>M. wittiorum</i> | 60 |
| 158 | Wittifuran H   | $C_{29}H_{34}O_7$ | 494 | <i>M. wittiorum</i> | 62 |
| 160 | Wittifuran I   | $C_{29}H_{36}O_8$ | 512 | <i>M. wittiorum</i> | 62 |
| 161 | Wittifuran J   | $C_{29}H_{36}O_8$ | 512 | <i>M. wittiorum</i> | 63 |
| 162 | Wittifuran K   | $C_{29}H_{38}O_9$ | 530 | <i>M. wittiorum</i> | 63 |
| 163 | Wittifuran L   | $C_{29}H_{38}O_9$ | 530 | <i>M. wittiorum</i> | 63 |
| 164 | Wittifuran M   | $C_{29}H_{38}O_9$ | 530 | <i>M. wittiorum</i> | 63 |
| 165 | Wittifuran N   | $C_{29}H_{38}O_9$ | 530 | <i>M. wittiorum</i> | 63 |
| 166 | Wittifuran O   | $C_{29}H_{34}O_6$ | 478 | <i>M. wittiorum</i> | 63 |
| 167 | Wittifuran P   | $C_{19}H_{18}O_4$ | 310 | <i>M. wittiorum</i> | 63 |
| 168 | Wittifuran Q   | $C_{19}H_{18}O_5$ | 326 | <i>M. wittiorum</i> | 63 |

---

|     |                                                               |                                                |     |                              |    |
|-----|---------------------------------------------------------------|------------------------------------------------|-----|------------------------------|----|
| 169 | Wittifuran R                                                  | C <sub>29</sub> H <sub>34</sub> O <sub>6</sub> | 478 | <i>M. wittiorum</i>          | 63 |
| 170 | Wittifuran S                                                  | C <sub>19</sub> H <sub>18</sub> O <sub>5</sub> | 326 | <i>M. wittiorum</i>          | 64 |
| 171 | Wittifuran T                                                  | C <sub>15</sub> H <sub>12</sub> O <sub>5</sub> | 272 | <i>M. wittiorum</i>          | 64 |
| 172 | Wittifuran U                                                  | C <sub>24</sub> H <sub>26</sub> O <sub>6</sub> | 410 | <i>M. wittiorum</i>          | 62 |
| 173 | Wittifuran V                                                  | C <sub>19</sub> H <sub>18</sub> O <sub>5</sub> | 326 | <i>M. wittiorum</i>          | 64 |
| 174 | Wittifuran W                                                  | C <sub>19</sub> H <sub>18</sub> O <sub>5</sub> | 326 | <i>M. wittiorum</i>          | 64 |
| 175 | Wittifuran X                                                  | C <sub>15</sub> H <sub>12</sub> O <sub>5</sub> | 272 | <i>M. wittiorum</i>          | 64 |
| 176 | Macrourin D                                                   | C <sub>28</sub> H <sub>20</sub> O <sub>9</sub> | 500 | <i>M. macroura</i>           | 65 |
| 177 | Macrourin E                                                   | C <sub>28</sub> H <sub>20</sub> O <sub>9</sub> | 500 | <i>M. alba</i>               | 66 |
| 178 | Austrafuran B                                                 | C <sub>28</sub> H <sub>20</sub> O <sub>8</sub> | 484 | <i>M. australis</i>          | 67 |
| 179 | Mulberrofuran B                                               | C <sub>25</sub> H <sub>28</sub> O <sub>4</sub> | 392 | <i>M. alba</i>               | 66 |
| 180 | Cathafuran A                                                  | C <sub>34</sub> H <sub>42</sub> O <sub>4</sub> | 514 | <i>M. cathayana</i>          | 67 |
| 181 | Cathafuran B                                                  | C <sub>24</sub> H <sub>26</sub> O <sub>4</sub> | 378 | <i>M. cathayana</i>          | 67 |
| 182 | Cathafuran C                                                  | C <sub>24</sub> H <sub>24</sub> O <sub>4</sub> | 376 | <i>M. cathayana</i>          | 67 |
| 183 | Cathafuran D                                                  | C <sub>25</sub> H <sub>28</sub> O <sub>5</sub> | 408 | <i>M. cathayana</i>          | 67 |
| 184 | 3',4,5'-trihydroxy-4'-<br>gerarylstilbene                     | C <sub>24</sub> H <sub>28</sub> O <sub>3</sub> | 364 | <i>M. cathayana</i>          | 68 |
| 185 | Mulberrofuran V                                               | C <sub>24</sub> H <sub>36</sub> O <sub>4</sub> | 388 | <i>M. cathayana</i>          | 69 |
| 186 | Artoindonesianin X                                            | C <sub>29</sub> H <sub>34</sub> O <sub>4</sub> | 446 | <i>M. cathayana</i>          | 68 |
| 187 | Mulberrofuran B                                               | C <sub>25</sub> H <sub>28</sub> O <sub>4</sub> | 392 | <i>M. alba</i>               | 66 |
| 188 | Mulberrofuran C                                               | C <sub>34</sub> H <sub>28</sub> O <sub>9</sub> | 580 | <i>M. alba</i>               | 70 |
| 189 | Mulberrofuran N                                               | C <sub>25</sub> H <sub>28</sub> O <sub>4</sub> | 392 | <i>M. cathayana</i>          | 68 |
| 190 | Mulberrofuran W                                               | C <sub>29</sub> H <sub>34</sub> O <sub>4</sub> | 446 | <i>M. mongolica</i>          | 71 |
| 191 | Mulberrofuran X                                               | C <sub>29</sub> H <sub>34</sub> O <sub>5</sub> | 462 | <i>M. mongolica</i>          | 71 |
| 192 | Mulberrofuran Y                                               | C <sub>25</sub> H <sub>28</sub> O <sub>5</sub> | 408 | <i>M. mongolica</i>          | 71 |
| 193 | Mulberrofuran Z                                               | C <sub>30</sub> H <sub>36</sub> O <sub>5</sub> | 476 | <i>M. mongolica</i>          | 71 |
| 194 | Demethylmoraccin I                                            | C <sub>19</sub> H <sub>18</sub> O <sub>4</sub> | 310 | <i>M. yunnanensis</i>        | 72 |
| 195 | 4'-(6,6-dimethyl-5-hydroxyl-2-<br>methylenecyclohexylmethyl)- | C <sub>24</sub> H <sub>26</sub> O <sub>5</sub> | 396 | <i>M. alba var. tatarica</i> | 73 |

---

|     |                                                                                                     |                                                |     |                              |    |
|-----|-----------------------------------------------------------------------------------------------------|------------------------------------------------|-----|------------------------------|----|
|     | 3',5',6-trihydroxy-2-arylbenzofuran                                                                 |                                                |     |                              |    |
| 196 | 2'-(1,3,3-trimethyl-7-oxabicyclo[2.2.1]hept-2-ylmethyl)-3'-methoxy-5',6-dihydroxy-2-arylbenzofuran  | C <sub>25</sub> H <sub>28</sub> O <sub>5</sub> | 408 | <i>M. alba var. tatarica</i> | 73 |
| 197 | 2'-(6-hydroxy-3,7-dimethyl-2,7-octadien-1-yl)-3'-methoxy-5',6-dihydroxy-2-arylbenzofuran            | C <sub>25</sub> H <sub>28</sub> O <sub>5</sub> | 408 | <i>M. alba var. tatarica</i> | 73 |
| 198 | 4'-(6-hydroxy-3,7-di-methyl-2,7-octadien-1-yl)-3',5',6-trihydroxy-2-arylbenzofuan                   | C <sub>24</sub> H <sub>26</sub> O <sub>5</sub> | 396 | <i>M. alba var. tatarica</i> | 73 |
| 199 | 2'-(6,7-dihydroxy-3,7-dimethyl-2-octen-1-yl)-3',5',6-trihydroxy-2-arylbenzofuan                     | C <sub>24</sub> H <sub>28</sub> O <sub>6</sub> | 414 | <i>M. alba var. tatarica</i> | 73 |
| 200 | 4'-(6,7-dihydroxy-3,7-dimethyl-2-octen-1-yl)-3',5',6-trihydroxy-2-arylbenzofuan                     | C <sub>24</sub> H <sub>28</sub> O <sub>6</sub> | 414 | <i>M. alba var. tatarica</i> | 73 |
| 201 | 2'-(6,7-dihydroxy-3,7-dimethyl-2-octen-1-yl)-3'-methoxy-5',6-dihydroxy-2-arylbenzofuran             | C <sub>25</sub> H <sub>30</sub> O <sub>6</sub> | 426 | <i>M. alba var. tatarica</i> | 73 |
| 202 | 2'-[(6S)-6-hydroxy-7-methoxy-3,7-dimethyl-2-octen-1-yl]-3'-methoxy-5',6-dihydroxy-2-arylbenzofuran. | C <sub>26</sub> H <sub>32</sub> O <sub>6</sub> | 440 | <i>M. alba var. tatarica</i> | 73 |
| 203 | 2'-[3-methyl-3-(4-methyl-3-penten-1-yl)-2-oxiranyl]methyl]-3',5',6-trihydroxy-2-arylbenzofuran      | C <sub>24</sub> H <sub>26</sub> O <sub>5</sub> | 396 | <i>M. alba var. tatarica</i> | 73 |

---



|     |                                                                                       |                                                 |     |                       |    |
|-----|---------------------------------------------------------------------------------------|-------------------------------------------------|-----|-----------------------|----|
| 204 | Albafuran B                                                                           | C <sub>24</sub> H <sub>26</sub> O <sub>4</sub>  | 378 | <i>M. alba</i>        | 60 |
|     | <b>Flavonoids</b>                                                                     |                                                 |     |                       |    |
| 205 | Yunanensol A                                                                          | C <sub>25</sub> H <sub>28</sub> O <sub>7</sub>  | 440 | <i>M. yunnanensis</i> | 63 |
| 206 | Yunanensol B                                                                          | C <sub>20</sub> H <sub>18</sub> O <sub>5</sub>  | 338 | <i>M. yunnanensis</i> | 63 |
| 207 | 5'-(1'',1''-dimethyl)-8-(8'',8''-<br>dimethylallyl)-2',4',5,7-<br>tetrahydroylflavone | C <sub>20</sub> H <sub>18</sub> O <sub>6</sub>  | 354 | <i>M. mongolica</i>   | 23 |
| 208 | Morunigrol A                                                                          | C <sub>25</sub> H <sub>22</sub> O <sub>6</sub>  | 418 | <i>M. nigra</i>       | 60 |
| 209 | Morunigrol B                                                                          | C <sub>25</sub> H <sub>24</sub> O <sub>6</sub>  | 420 | <i>M. nigra</i>       | 60 |
| 210 | Morunigrol E                                                                          | C <sub>25</sub> H <sub>26</sub> O <sub>7</sub>  | 438 | <i>M. nigra</i>       | 74 |
| 211 | Morunigrol G                                                                          | C <sub>25</sub> H <sub>26</sub> O <sub>7</sub>  | 438 | <i>M. nigra</i>       | 74 |
| 212 | Morunigrol H                                                                          | C <sub>25</sub> H <sub>16</sub> O <sub>6</sub>  | 412 | <i>M. nigra</i>       | 74 |
| 213 | Morachalcone B                                                                        | C <sub>20</sub> H <sub>18</sub> O <sub>5</sub>  | 338 | <i>M. alba</i>        | 75 |
| 214 | Morachalcone C                                                                        | C <sub>20</sub> H <sub>18</sub> O <sub>6</sub>  | 354 | <i>M. alba</i>        | 75 |
| 215 | Morachalcone A                                                                        | C <sub>20</sub> H <sub>20</sub> O <sub>5</sub>  | 340 | <i>M. yunnanensis</i> | 76 |
| 217 | Isobacachalcone                                                                       | C <sub>20</sub> H <sub>20</sub> O <sub>4</sub>  | 324 | <i>M. cathayana</i>   | 68 |
| 218 | Morusin                                                                               | C <sub>25</sub> H <sub>24</sub> O <sub>6</sub>  | 420 | <i>M. alba</i>        | 77 |
| 219 | Cyclomorusin                                                                          | C <sub>25</sub> H <sub>22</sub> O <sub>6</sub>  | 418 | <i>M. alba</i>        | 78 |
| 220 | Kuwanon C                                                                             | C <sub>25</sub> H <sub>26</sub> O <sub>6</sub>  | 422 | <i>M. alba</i>        | 77 |
| 221 | 3-(2''-hydroxyl-3''-methyl-3''-<br>butenyl)-morusin                                   | C <sub>25</sub> H <sub>24</sub> O <sub>7</sub>  | 436 | <i>M. cathayana</i>   | 68 |
| 222 | 6-geranylapienin                                                                      | C <sub>25</sub> H <sub>26</sub> O <sub>5</sub>  | 406 | <i>M. cathayana</i>   | 68 |
| 223 | Licoisoflavanone                                                                      | C <sub>20</sub> H <sub>18</sub> O <sub>6</sub>  | 354 | <i>M. cathayana</i>   | 68 |
| 224 | Kamperfol-3-glucopyranoside                                                           | C <sub>21</sub> H <sub>20</sub> O <sub>11</sub> | 448 | <i>M. cathayana</i>   | 68 |
| 225 | Benzokuwanon E                                                                        | C <sub>25</sub> H <sub>24</sub> O <sub>7</sub>  | 436 | <i>M. australia</i>   | 79 |
| 226 | Hydroxymorusin                                                                        | C <sub>25</sub> H <sub>26</sub> O <sub>7</sub>  | 438 | <i>M. australia</i>   | 79 |
| 227 | Jisang                                                                                | C <sub>25</sub> H <sub>26</sub> O <sub>6</sub>  | 422 | <i>M. australia</i>   | 79 |
| 228 | Kuwanon E                                                                             | C <sub>25</sub> H <sub>28</sub> O <sub>6</sub>  | 424 | <i>M. australia</i>   | 79 |
| 229 | Kuwanon U                                                                             | C <sub>26</sub> H <sub>30</sub> O <sub>6</sub>  | 438 | <i>M. australia</i>   | 79 |

|     |                      |                                                |     |                        |    |
|-----|----------------------|------------------------------------------------|-----|------------------------|----|
| 230 | Kuwanon S            | C <sub>25</sub> H <sub>26</sub> O <sub>5</sub> | 406 | <i>M. alba</i>         | 78 |
| 231 | Morusignin L         | C <sub>25</sub> H <sub>26</sub> O <sub>7</sub> | 438 | <i>M. australia</i>    | 79 |
| 232 | Morusinol            | C <sub>25</sub> H <sub>26</sub> O <sub>7</sub> | 438 | <i>M. australia</i>    | 79 |
| 233 | Mulberranol          | C <sub>25</sub> H <sub>26</sub> O <sub>7</sub> | 438 | <i>M. australia</i>    | 79 |
| 234 | Cathayanon F         | C <sub>25</sub> H <sub>26</sub> O <sub>5</sub> | 406 | <i>M. cathayana</i>    | 68 |
| 235 | Cathayanon G         | C <sub>25</sub> H <sub>26</sub> O <sub>6</sub> | 422 | <i>M. cathayana</i>    | 68 |
| 236 | Cathayanon H         | C <sub>25</sub> H <sub>28</sub> O <sub>6</sub> | 424 | <i>M. cathayana</i>    | 68 |
| 237 | Cathayanon I         | C <sub>25</sub> H <sub>28</sub> O <sub>7</sub> | 440 | <i>M. cathayana</i>    | 68 |
| 238 | Cathayanon J         | C <sub>30</sub> H <sub>36</sub> O <sub>6</sub> | 492 | <i>M. cathayana</i>    | 68 |
| 239 | Sanggenol G          | C <sub>30</sub> H <sub>34</sub> O <sub>7</sub> | 506 | <i>M. cathayana</i>    | 68 |
| 240 | sanggenol O          | C <sub>25</sub> H <sub>24</sub> O <sub>6</sub> | 420 | <i>M. atropurpurea</i> | 80 |
| 241 | Sanggenol P          | C <sub>30</sub> H <sub>36</sub> O <sub>6</sub> | 492 | <i>M. alba</i>         | 81 |
| 242 | Sanggenol N          | C <sub>25</sub> H <sub>26</sub> O <sub>6</sub> | 422 | <i>M. alba</i>         | 81 |
| 243 | Cyclomulberrin       | C <sub>25</sub> H <sub>24</sub> O <sub>6</sub> | 420 | <i>M. alba</i>         | 81 |
| 244 | Cyclocommunol        | C <sub>20</sub> H <sub>16</sub> O <sub>6</sub> | 352 | <i>M. alba</i>         | 81 |
| 245 | Sanggenol A          | C <sub>25</sub> H <sub>24</sub> O <sub>7</sub> | 436 | <i>M. cathayana</i>    | 68 |
| 246 | Isolicoflavonol      | C <sub>20</sub> H <sub>18</sub> O <sub>6</sub> | 354 | <i>M. australis</i>    | 82 |
| 247 | Quercetin            | C <sub>15</sub> H <sub>10</sub> O <sub>7</sub> | 302 | <i>M. australis</i>    | 82 |
| 248 | Dihydromorin         | C <sub>15</sub> H <sub>12</sub> O <sub>7</sub> | 304 | <i>M. cathayana</i>    | 68 |
| 249 | Glyasperin F         | C <sub>20</sub> H <sub>18</sub> O <sub>6</sub> | 354 | <i>M. cathayana</i>    | 68 |
| 250 | Brousoflavonol F     | C <sub>25</sub> H <sub>26</sub> O <sub>6</sub> | 422 | <i>M. cathayana</i>    | 68 |
| 251 | Lespedezaflavanone C | C <sub>25</sub> H <sub>28</sub> O <sub>6</sub> | 424 | <i>M. cathayana</i>    | 68 |
| 252 | Sanggenol B          | C <sub>30</sub> H <sub>34</sub> O <sub>6</sub> | 490 | <i>M. alba</i>         | 77 |
| 253 | Sanggenol D          | C <sub>30</sub> H <sub>36</sub> O <sub>6</sub> | 492 | <i>M. alba</i>         | 77 |
| 254 | Dihydrokaempferol    | C <sub>15</sub> H <sub>12</sub> O <sub>6</sub> | 288 | <i>M. nigra</i>        | 74 |
| 255 | Norartocarpanone     | C <sub>15</sub> H <sub>12</sub> O <sub>6</sub> | 288 | <i>M. cathayana</i>    | 68 |
| 256 | Nigrasin A           | C <sub>25</sub> H <sub>26</sub> O <sub>8</sub> | 454 | <i>M. nigra</i>        | 83 |
| 257 | Nigrasin B           | C <sub>25</sub> H <sub>26</sub> O <sub>8</sub> | 454 | <i>M. nigra</i>        | 83 |
| 258 | Nigrasin C           | C <sub>25</sub> H <sub>26</sub> O <sub>8</sub> | 454 | <i>M. nigra</i>        | 83 |

|               |                                                       |                                                 |     |                       |    |
|---------------|-------------------------------------------------------|-------------------------------------------------|-----|-----------------------|----|
| 259           | Nigrasin D                                            | C <sub>25</sub> H <sub>26</sub> O <sub>8</sub>  | 454 | <i>M. nigra</i>       | 83 |
| 260           | Nigrasin E                                            | C <sub>25</sub> H <sub>26</sub> O <sub>7</sub>  | 454 | <i>M. nigra</i>       | 83 |
| 261           | Nigrasin F                                            | C <sub>25</sub> H <sub>24</sub> O <sub>7</sub>  | 436 | <i>M. nigra</i>       | 83 |
| 262           | Nigrasin G                                            | C <sub>30</sub> H <sub>34</sub> O <sub>8</sub>  | 522 | <i>M. nigra</i>       | 83 |
| 263           | Nigrasin H                                            | C <sub>25</sub> H <sub>26</sub> O <sub>6</sub>  | 422 | <i>M. nigra</i>       | 83 |
| 264           | Nigrasin I                                            | C <sub>25</sub> H <sub>26</sub> O <sub>6</sub>  | 422 | <i>M. nigra</i>       | 83 |
| 265           | Nigrasin J                                            | C <sub>26</sub> H <sub>28</sub> O <sub>8</sub>  | 468 | <i>M. nigra</i>       | 83 |
| 266           | Sanggenol L                                           | C <sub>25</sub> H <sub>26</sub> O <sub>6</sub>  | 422 | <i>M. mongolica</i>   | 71 |
| 267           | Morusyunnansin E                                      | C <sub>21</sub> H <sub>24</sub> O <sub>5</sub>  | 356 | <i>M. yunnanensis</i> | 48 |
| 268           | Morusyunnansin F                                      | C <sub>20</sub> H <sub>22</sub> O <sub>4</sub>  | 326 | <i>M. yunnanensis</i> | 48 |
| 269           | Morusyunnansin G                                      | C <sub>21</sub> H <sub>26</sub> O <sub>6</sub>  | 374 | <i>M. yunnanensis</i> | 72 |
| <b>Others</b> |                                                       |                                                 |     |                       |    |
| 270           | 1-deoxnojirimycin                                     | C <sub>6</sub> H <sub>13</sub> NO <sub>4</sub>  | 163 | <i>M. alba</i>        | 84 |
| 271           | N-methy-1-deoxyno-jirimycin                           | C <sub>7</sub> H <sub>15</sub> NO <sub>4</sub>  | 177 | <i>M. alba</i>        | 84 |
| 272           | Fagomine                                              | C <sub>6</sub> H <sub>13</sub> NO <sub>3</sub>  | 147 | <i>M. alba</i>        | 84 |
| 273           | 3-epi-fagomine                                        | C <sub>6</sub> H <sub>13</sub> NO <sub>3</sub>  | 147 | <i>M. alba</i>        | 84 |
| 274           | 2-O- $\alpha$ -D-galaetopyranosyl-1-deoxyno-jirimycin | C <sub>12</sub> H <sub>23</sub> NO <sub>9</sub> | 325 | <i>M. alba</i>        | 84 |
| 275           | 6-O- $\alpha$ -D-galactopyranosyl-1-deoxyno-jirimycin | C <sub>12</sub> H <sub>23</sub> NO <sub>9</sub> | 325 | <i>M. alba</i>        | 84 |
| 276           | 2-O- $\alpha$ -D-glucopyranosyl-1-deoxyno-jirimycin   | C <sub>12</sub> H <sub>23</sub> NO <sub>9</sub> | 325 | <i>M. alba</i>        | 84 |
| 277           | 3-O- $\alpha$ -D-glucopyranosyl-1-deoxyno-jirimycin   | C <sub>12</sub> H <sub>23</sub> NO <sub>9</sub> | 325 | <i>M. alba</i>        | 84 |
| 278           | 3-O- $\alpha$ -D-glucopyranosyl-1-deoxyno-jirimycin   | C <sub>12</sub> H <sub>23</sub> NO <sub>9</sub> | 325 | <i>M. alba</i>        | 84 |
| 279           | 2-O- $\beta$ -D-glucopyranosyl-1-deoxyno-jirimycin    | C <sub>12</sub> H <sub>23</sub> NO <sub>9</sub> | 325 | <i>M. alba</i>        | 84 |
| 280           | 3-O- $\beta$ -D-glucopyranosyl-1-deoxyno-jirimycin    | C <sub>12</sub> H <sub>23</sub> NO <sub>9</sub> | 325 | <i>M. alba</i>        | 85 |

---

|     |                                 |                                                              |     |                |    |
|-----|---------------------------------|--------------------------------------------------------------|-----|----------------|----|
|     | deoxynojirimycin                |                                                              |     |                |    |
| 281 | 4-O-β-D-glucopyranosyl-1-       | C <sub>12</sub> H <sub>23</sub> NO <sub>9</sub>              | 325 | <i>M. alba</i> | 85 |
|     | deoxynojirimycin                |                                                              |     |                |    |
| 282 | 6-O-β-D-glucopyranosyl-1-       | C <sub>12</sub> H <sub>23</sub> NO <sub>9</sub>              | 325 | <i>M. alba</i> | 85 |
|     | deoxynojirimycin                |                                                              |     |                |    |
| 283 | 1,4-dideoxy-1,4-imino-D-        | C <sub>5</sub> H <sub>11</sub> NO <sub>3</sub>               | 133 | <i>M. alba</i> | 84 |
|     | arabinitol                      |                                                              |     |                |    |
| 284 | 1,4-dideoxy-1,4-imino-D-ribitol | C <sub>5</sub> H <sub>11</sub> NO <sub>3</sub>               | 133 | <i>M. alba</i> | 84 |
| 285 | 1,4-dideoxy-1,4-imino-(2-O-β-   | C <sub>11</sub> H <sub>21</sub> NO <sub>8</sub>              | 295 | <i>M. alba</i> | 85 |
|     | D-glucopyranosyl)-D-arabinitol  |                                                              |     |                |    |
| 286 | (2R,3R,4R)-2-hydroxymethyl-     | C <sub>8</sub> H <sub>16</sub> N <sub>2</sub> O <sub>4</sub> | 205 | <i>M. alba</i> | 85 |
|     | 3,4-dihydroxypyrrolidine-N-     |                                                              |     |                |    |
|     | propionamide                    |                                                              |     |                |    |
| 287 | Calystegin B <sub>2</sub>       | C <sub>7</sub> H <sub>13</sub> NO <sub>4</sub>               | 175 | <i>M. alba</i> | 84 |
| 288 | Calystegin C <sub>1</sub>       | C <sub>7</sub> H <sub>13</sub> NO <sub>5</sub>               | 191 | <i>M. alba</i> | 84 |
| 289 | 2α,3β-dihydroxynortropane       | C <sub>7</sub> H <sub>14</sub> NO <sub>2</sub>               | 144 | <i>M. alba</i> | 86 |
| 290 | 2β,3β-dihydroxynortropane       | C <sub>7</sub> H <sub>14</sub> NO <sub>2</sub>               | 144 | <i>M. alba</i> | 86 |
| 291 | 2α,3β,6exo-                     | C <sub>7</sub> H <sub>12</sub> NO <sub>3</sub>               | 158 | <i>M. alba</i> | 86 |
|     | trihydroxynortropane            |                                                              |     |                |    |
| 292 | 2α,3β,4α-trihydroxynortropane   | C <sub>7</sub> H <sub>14</sub> NO <sub>3</sub>               | 160 | <i>M. alba</i> | 86 |
| 293 | 3β,6exo-trihydroxynortropane    | C <sub>7</sub> H <sub>12</sub> NO <sub>2</sub>               | 142 | <i>M. alba</i> | 86 |
| 294 | 3β,6β-dihydroxynortropane       | C <sub>7</sub> H <sub>14</sub> NO <sub>2</sub>               | 144 | <i>M. alba</i> | 85 |

---

---

|     |                                             |                    |     |                |    |
|-----|---------------------------------------------|--------------------|-----|----------------|----|
| 295 | 4- <i>O</i> - $\alpha$ -D-galactopyranosyl- | $C_{13}H_{23}NO_9$ | 337 | <i>M. alba</i> | 85 |
|     | calystegin                                  |                    |     |                |    |

---

166

## 167 References

- 168 1 Y. Hano, K. Hirakura, T. Nomura, S. Terada and K. Fukushima, *Planta Med.*, 1984, **50**, 127.
- 169 2 T. Nomura, T. Fukai, Y. Hano, K. Nemoto, S. Terada and T. Kuramochi, *Planta Med.*, 1983,  
170 47, 151.
- 171 3 S.J. Dai, Z.B. Ma, Y. Wu, R.Y. Chen and D.Q. Yu, *Phytochemistry*, 2004, **65**, 3135.
- 172 4 Y.Y. Xiong, J.S. Wang, F.H. Wu, J. Li and L.Y. Kong, *Int. Immunopharmacol.*, 2012, **14**,  
173 392.
- 174 5 T. Nomura and T. Fukai, *Heterocycles*, 1980, **14**, 9.
- 175 6 J. Kang, R.Y. Chen and D.Q. Yu, *Planta Med.*, 2006, **72**, 52.
- 176 7 Y. Oshima, C. Konno and H. Kikino, *Heterocycles*, 1980, **14**, 4.
- 177 8 F. Ferrari, F. Delle Monache, A.I. Suarez and R.S. Compagnone, *Fitoterapia*, 2000, **71**, 213.
- 178 9 Y. Oshima, C. Konno and H. Kikino, *Heterocycles*, 1981, **16**, 4.
- 179 10 Q.J. Zhang, Y.B. Tang, R.Y. Chen and D.Q. Yu, *Chem. Biodivers.*, 2007, **4**, 1533.
- 180 11 T. Fukai, Y.H. Pei, T. Nomura, C.Q. Xu, L.J. Wu and Y.J. Chen, *Phytochemistry*, 1988, **47**, 8.
- 181 12 Y. Hano, H. Kohno and S. Suzuki, *Heterocycles*, 1986, **24**, 7.
- 182 13 Y.Q. Shi, T. Fukai and T. Nomura, *Heterocycles*, 2001, **54**, 8.
- 183 14 R.C. Shen and M. Lin, *Phytochemistry*, 2001, **57**, 1231.
- 184 15 J. Sun, Y. Hano and T. Nomura, *Heterocycles*, 1989, **29**, 8.
- 185 16 Y. Hano, K. Ichikawa and M. Okuyama, *Heterocycles*, 1995, **40**, 4.
- 186 17 S.J. Dai, Z.M. Mi, Z.B. Ma, S. Li, R.Y. Chen and D.Q. Yu, *Planta Med.*, 2004, **70**, 758.
- 187 18 L. Cui, M. Na, H. Oh, E.Y. Bae, D.G. Jeong, S.E. Ryu, S. Kim, B.Y. Kim, W.K. Oh and J.S.  
188 Ahn, *Bioorg. Med. Chem. Lett.*, 2006, **16**, 1426.
- 189 19 S.J. Dai, Y. Wu, Y.H. Wang, W.Y. He, R.Y. Chen and D.Q. Yu, *Chem. Pharm. Bull.*, 2004,  
190 **52**, 1190.
- 191 20 Q.J. Zhang, G. Ni, Y.H. Wang, R.Y. Chen and D.Q. Yu, *J. Asian Nat. Prod. Res.*, 2009, **11**,  
192 267.

- 193 21 T. Nomura, T. Fukai, J. Matsumoto, A. Imashimizu, S. Terada and M. Hama, *Planta Med.*,  
194 2009, **46**, 167.
- 195 22 J. Ikuta, T. Fukai, T. Nomura and S. Ueda, *Chem. Pharm. Bull.*, 1986, **34**, 8.
- 196 23 J. Kang, R.Y. Chen and D.Q. Yu, *Chin. Chem. L.*, 2005, **16**, 3.
- 197 24 Y. Hano, T. Nomura and S. Ueda, *Heterocycles*, 1989, **29**, 7.
- 198 25 K. Hirakura, Y. Hano and T. Fukai, *Chem. Pharm. Bull.*, 1985, **33**, 9.
- 199 26 Y. Hano, H. Tsubura and T. Nomura, *Heterocycles*, 1986, **24**, 8.
- 200 27 Y. Hano, M. Itoh and T. Nomura, *Heterocycles*, 1985, **23**, 6.
- 201 28 T. Nomura, T. Fukai and J. Matsumoto, *Heterocycles*, 1981, **16**, 7.
- 202 29 P. Basnet, S. Kadota, S. Terashima, M. Shimizu and T. Namba, *Chem. Pharm. Bull.*, 1993,  
203 **41**, 1238.
- 204 30 X.D. Gu, M.Y. Sun, L. Zhang, H.W. Fu, L. Cui, R.Z. Chen, D.W. Zhang and J.K. Tian,  
205 *Molecules*, 2010, **15**, 2980.
- 206 31 Y. Hano, H. Kohno, M. Itoh and T. Nomura, *Chem. Pharm. Bull.*, 1985, **33**, 7.
- 207 32 S. Ueda, J. Matsumoto and T. Nomura, *Chem. Pharm. Bull.*, 1985, **32**, 4.
- 208 33 T. Fukai, Y. Hano, K. Hirakura, T. Nomura, J. Uzawa and K. Fukushima, *Chem. Pharm.*  
209 *Bull.*, 1985, **33**, 3195.
- 210 34 Y. Hano, H. Tsubura and T. Nomura, *Heterocycles*, 1986, **24**, 7.
- 211 35 C.A. Geng, Y.B. Ma, X.M. Zhang, S.Y. Yao, D.Q. Xue, R.P. Zhang and J.J. Chen, *J. Agric.*  
212 *Food Chem.*, 2010, **60**, 8197.
- 213 36 Y. Hano and T. Nomura, *Heterocycles*, 1986, **24**, 6.
- 214 37 Y. Hano, M. Miyagawa, M. Yano and T. Nomura, *Heterocycles*, 1989, **28**, 5.
- 215 38 X.Q. Cui, in Beijing academy of medical sciences institute of medicine, Beijing academy of  
216 medical sciences, Beijing, 2008.
- 217 39 T. Nomura, T. Fukai and Y. Hano, *Heterocycles*, 1986, **20**, 7.
- 218 40 M. Takasugi, S. Nagao and T. Masamune, *Chem. Lett.*, 1982, **11**, 4.
- 219 41 T. Fukai, Y. Hano and K. Hirakura, *Chem. Pharm. Bull.*, 1984, **32**, 4.
- 220 42 Y. Hano, M. Itoh and T. Fukai, *Heterocycles*, 1985, **23**, 6.
- 221 43 H. Kohno, K. Takaba and T. Fukai, *Heterocycles*, 1987, **26**, 4.
- 222 44 T. Nomura and T. Fukai, *Chem. Pharm. Bull.*, 1980, **28**, 6.

- 223 45 Y.X. Tan, R.Y. Yan, H.Q. Wang, R.Y. Chen and D.Q. Yu, *Planta Med.*, 2009, **75**, 249.
- 224 46 Y. Yang, H.Q. Wang and R.Y. Chen, *Yao Xue Xue Bao*, 2010, **45**, 77.
- 225 47 G. Ni, Q.J. Zhang, Y.H. Wang, R.Y. Chen, Z.F. Zheng and D.Q. Yu, *J. Asian Nat. Prod. Res.*,  
226 2010, **12**, 505.
- 227 48 X. Hu, J.W. Wu, M. Wang, M.H. Yu, Q.S. Zhao, H.Y. Wang and A.J. Hou, *J. Nat. Prod.*,  
228 2012, **75**, 82.
- 229 49 S.J. Piao, L.X. Chen, N. Kang and F. Qiu, *Phytochem. Anal.*, 2011, **22**, 230.
- 230 50 Y.M. Syah, S.A. Achmad, E.L. Ghisalberti, E.H. Hakim, M.Z. Iman, L. Makmur and D.  
231 Mujahiddin, *Fitoterapia*, 2000, **71**, 630.
- 232 51 S.G. Sun and R.Y. Chen, *ZhongYiYao XueKan*, 2005, **23**, 3.
- 233 52 Y.X. Tan, C. Liu and R.Y. Chen, *Yao Xue Xue Bao*, 2008, **43**, 1119.
- 234 53 M. Takasugi, S. Nagao and T. Masamune, *Tetrahedron Lett.*, 1978, **19**, 2.
- 235 54 M. Takasugi, S. Nagao and S. Ueno, *Chem. Lett.*, 1978, **11**, 2.
- 236 55 M. Takasugi, S. Nagao and T. Masamune, *Tetrahedron Lett.*, 1979, **20**, 4.
- 237 56 I.S. Mann, and D.A. Widdowson, *Tetrahedron*, 1991, **47**, 10.
- 238 57 G.D. Kapche, C.D. Fozing, J.H. Donfack, G.W. Fotso, D. Amadou, A.N. Tchana, M.  
239 Bezabih, P.F. Moundipa, B.T. Ngadjui and B.M. Abegaz, *Phytochemistry*, 2009, **70**, 216.
- 240 58 Y. Yang, T. Gong, C. Liu and R.Y. Chen, *Chem. Pharm. Bull.*, 2010, **58**, 257.
- 241 59 S.H. Jeong, Y.B. Ryu, M.J. Curtis-Long, H.W. Ryu, Y.S. Baek, J.E. Kang, W.S. Lee and  
242 K.H. Park, *J. Agric. Food Chem.*, 2009, **57**, 1195.
- 243 60 L. Wang, X.Q. Cui, T. Gong, R.Y. Yan, Y.X. Tan and R.Y. Chen, *J. Asian Nat. Prod. Res.*,  
244 2008, **10**, 897.
- 245 61 S.G. Sun, R.Y. Chen and D.Q. Yu, *J. Asian Nat. Prod. Res.*, 2001, **3**, 253.
- 246 62 Y.X. Tan, H.Q. Wang and R.Y. Chen, *Fitoterapia*, 2012, **83**, 750.
- 247 63 X.Q. Cui, L. Wang, R.Y. Yan, Y.X. Tan, R.Y. Chen and D.Q. Yu, *J. Asian Nat. Prod. Res.*,  
248 2008, **10**, 361.
- 249 64 Y.X. Tan, Y. Yang, T. Zhang, R.Y. Chen and D.Q. Yu, *Fitoterapia*, 2010, **81**, 742.
- 250 65 S.J. Dai, Z.B. Ma, S. Li, R.Y. Chen and D.Q. Yu, *Chin. Chem. L.*, 2004, **15**, 3.
- 251 66 T. Nomura and T. Fukai, *Planta Med.*, 1981, **42**, 197.
- 252 67 Q.J. Zhang, Z.F. Zheng, R.Y. Chen and D.Q. Yu, *J. Asian Nat. Prod. Res.*, 2009, **11**, 138.

253 68 G. Ni, in, Chinese Academy of Medical Sciences & Peking Union Medical College, Beijing,  
254 2010.

255 69 T. Fukai, Y.H. Pei and T. Nomura, *Heterocycles*, 1996, **43**, 425.

256 70 T. Nomura, T. Fukai, J. Matsumoto and T. Ohmori, *Planta Med.*, 1982, **46**, 28.

257 71 Y.Q. Shi, T. Fukai, H. Sakagami, W.J. Chang, P.Q. Yang, F.P. Wang and T. Nomura, *J. Nat.*  
258 *Prod.*, 2001, **64**, 181.

259 72 H.X. Yang and X. Hu, *Zhongguo Zhong Yao Za Zhi*, 2013, **38**, 1735.

260 73 Y.L. Zhang, J.G. Luo, C.X. Wan, Z.B. Zhou and L.Y. Kong, *Fitoterapia*, 2014, **92**, 116.

261 74 L. Wang, in, Chinese Academy of Medical Sciences & Peking Union Medical College,  
262 Beijing, 2008.

263 75 Y. Yang, T. Zhang, L. Xiao, L. Yang and R. Chen, *Fitoterapia*, 2010, **81**, 614.

264 76 X.Q. Cui, H.Q. Wang, C. Liu and R.Y. Chen, *Zhongguo Zhong Yao Za Zhi*, 2008, **33**, 1569.

265 77 W.W. Weaver, W.F. White and A.J. Kingston, Jr., *J. Psychol.*, 1968, **68**, 87.

266 78 J. Du, Z.D. He, R.W. Jiang, W.C. Ye, H.X. Xu and P.P. But, *Phytochemistry*, 2003, **62**, 1235.

267 79 Z.F. Zheng, in, Chinese Academy of Medical Sciences & Peking Union Medical College,  
268 Beijing, 2010.

269 80 D. Wu, X. Zhang, X. Huang, X. He, G. Wang and W. Ye, *Zhongguo Zhong Yao Za Zhi*, 2010,  
270 **35**, 1978.

271 81 C. Geng, S. Yao, D. Xue, A. Zuo, X. Zhang, Z. Jiang, Y. Ma and J. Chen, *Zhongguo Zhong*  
272 *Yao Za Zhi*, 2010, **35**, 1560.

273 82 Q.J. Zhang, in, Chinese Academy of Medical Sciences & Peking Union Medical College,  
274 2007.

275 83 X. Hu, J.W. Wu, X.D. Zhang, Q.S. Zhao, J.M. Huang, H.Y. Wang, A.J. Hou, *J. Nat. Prod.*,  
276 2011, **74**, 816.

277 84 N. Asano, K. Oseki, E. Tomioka, H. Kizu and K. Matsui, *Carbohydr. Res.*, 1994, **259**, 243.

278 85 N. Asano, T. Yamashita, K. Yasuda, K. Ikeda, H. Kizu, Y. Kameda, A. Kato, R.J. Nash, H.S.  
279 Lee and K.S. Ryu, *J. Agric. Food Chem.*, 2001, **49**, 4208.

280 86 G. Kusano, S. Orihara, D. Tsukamoto, M. Shibano, M. Coskun, A. Guvenc, C.S. Erdurak,  
281 *Chem. Pharm. Bull.*, 2002, **50**, 185.

282
